# Supplementary material
Source: MDPI journal article supplement (https://www.mdpi.com/1999-4907/13/7/1152)
Supplement: s1 [file s1]

**Table S1:** Genotyping data of four populations and progenies.

| NO. | IPS | No. | Male | Female | AV-47 |     | C-31 |     | AV-46 |     | AV-43 |     | AV-48 |     | C-41 |     | AV-44 |     | C-27 |     | C-20 |     | C-36 |     | C-15 |     | C-26 |     |
|-----|-----|-----|------|--------|-------|-----|------|-----|-------|-----|-------|-----|-------|-----|------|-----|-------|-----|------|-----|------|-----|------|-----|------|-----|------|-----|
| 1   | 724 |     | ✓    |        | 176   | 182 | 0    | 0   | 322   | 322 | 188   | 188 | 170   | 176 | 0    | 0   | 0     | 0   | 223  | 223 | 275  | 275 | 218  | 234 | 218  | 218 | 0    | 0   |
| 4   | 727 | ✓   |      |        | 178   | 183 | 233  | 233 | 323   | 323 | 188   | 189 | 176   | 176 | 346  | 374 | 178   | 178 | 223  | 223 | 275  | 275 | 0    | 0   | 0    | 0   | 197  | 217 |
| 5   | 728 | ✓   |      |        | 179   | 181 | 254  | 254 | 323   | 323 | 0     | 0   | 177   | 178 | 343  | 346 | 178   | 191 | 223  | 223 | 275  | 275 | 234  | 238 | 192  | 196 | 218  | 218 |
| 6   | 729 | ✓   |      |        | 179   | 182 | 232  | 232 | 323   | 323 | 189   | 191 | 176   | 176 | 347  | 347 | 0     | 0   | 224  | 224 | 275  | 275 | 235  | 238 | 0    | 0   | 218  | 218 |
| 7   | 730 | ✓   |      |        | 181   | 181 | 233  | 253 | 323   | 323 | 189   | 191 | 176   | 176 | 347  | 375 | 0     | 0   | 224  | 224 | 275  | 275 | 235  | 238 | 195  | 195 | 218  | 218 |
| 8   | 731 |     | ✓    |        | 181   | 181 | 233  | 233 | 323   | 334 | 185   | 191 | 170   | 170 | 354  | 390 | 179   | 185 | 224  | 224 | 236  | 275 | 235  | 240 | 0    | 0   | 197  | 217 |
| 11  | 734 |     | ✓    |        | 178   | 183 | 233  | 233 | 332   | 336 | 191   | 191 | 179   | 179 | 0    | 0   | 178   | 191 | 223  | 223 | 275  | 275 | 235  | 235 | 0    | 0   | 218  | 218 |
| 12  | 735 |     | ✓    |        | 179   | 183 | 254  | 254 | 333   | 337 | 191   | 191 | 0     | 0   | 346  | 346 | 0     | 0   | 223  | 223 | 275  | 275 | 0    | 0   | 0    | 0   | 0    | 0   |
| 13  | 736 |     | ✓    |        | 179   | 183 | 0    | 0   | 323   | 333 | 191   | 191 | 186   | 186 | 346  | 346 | 176   | 182 | 206  | 223 | 275  | 275 | 235  | 235 | 0    | 0   | 218  | 218 |
| 14  | 737 |     | ✓    |        | 182   | 182 | 0    | 0   | 330   | 335 | 189   | 191 | 176   | 176 | 347  | 379 | 0     | 0   | 224  | 224 | 0    | 0   | 0    | 0   | 195  | 195 | 0    | 0   |
| 15  | 738 |     | ✓    |        | 182   | 182 | 233  | 233 | 330   | 335 | 189   | 198 | 178   | 178 | 347  | 357 | 179   | 179 | 224  | 224 | 0    | 0   | 0    | 0   | 0    | 0   | 0    | 0   |
| 16  | 740 | ✓   |      |        | 182   | 182 | 233  | 233 | 335   | 337 | 189   | 198 | 176   | 181 | 357  | 365 | 179   | 179 | 224  | 224 | 0    | 0   | 235  | 235 | 195  | 195 | 0    | 0   |
| 17  | 741 |     | ✓    |        | 176   | 183 | 0    | 0   | 334   | 334 | 188   | 188 | 0     | 0   | 0    | 0   | 0     | 0   | 0    | 0   | 275  | 277 | 235  | 235 | 197  | 197 | 0    | 0   |
| 20  | 744 | ✓   |      |        | 176   | 183 | 0    | 0   | 332   | 335 | 189   | 189 | 178   | 179 | 346  | 356 | 178   | 185 | 206  | 223 | 0    | 0   | 0    | 0   | 0    | 0   | 0    | 0   |
| 21  | 745 | ✓   |      |        | 179   | 183 | 232  | 232 | 323   | 323 | 189   | 191 | 176   | 176 | 347  | 347 | 0     | 0   | 224  | 224 | 275  | 275 | 235  | 235 | 0    | 0   | 218  | 218 |
| 27  | 751 | ✓   |      |        | 179   | 183 | 232  | 232 | 323   | 323 | 189   | 191 | 176   | 176 | 347  | 347 | 0     | 0   | 224  | 224 | 275  | 275 | 235  | 235 | 0    | 0   | 218  | 218 |
| 28  | 752 | ✓   |      |        | 179   | 183 | 232  | 232 | 323   | 323 | 189   | 191 | 176   | 176 | 347  | 347 | 0     | 0   | 224  | 224 | 275  | 275 | 235  | 235 | 0    | 0   | 218  | 218 |
| 29  | 753 |     | ✓    |        | 183   | 183 | 0    | 0   | 327   | 327 | 0     | 0   | 176   | 181 | 356  | 364 | 178   | 178 | 223  | 223 | 275  | 275 | 235  | 238 | 0    | 0   | 197  | 217 |
| 32  | 756 | ✓   |      |        | 0     | 0   | 232  | 232 | 327   | 327 | 191   | 200 | 181   | 181 | 347  | 357 | 0     | 0   | 224  | 224 | 275  | 289 | 235  | 242 | 0    | 0   | 0    | 0   |
| 34  | 758 |     | ✓    |        | 176   | 181 | 254  | 254 | 0     | 0   | 0     | 0   | 176   | 181 | 346  | 374 | 178   | 185 | 206  | 223 | 275  | 275 | 233  | 233 | 197  | 197 | 0    | 0   |
| 35  | 759 |     | ✓    |        | 178   | 183 | 232  | 232 | 336   | 336 | 0     | 0   | 185   | 185 | 0    | 0   | 178   | 178 | 223  | 223 | 275  | 275 | 235  | 235 | 197  | 197 | 0    | 0   |
| 36  | 760 | ✓   |      |        | 178   | 183 | 254  | 254 | 327   | 336 | 0     | 0   | 181   | 181 | 346  | 346 | 178   | 178 | 223  | 223 | 235  | 275 | 219  | 235 | 193  | 193 | 217  | 217 |
| 38  | 762 |     | ✓    |        | 179   | 182 | 0    | 0   | 327   | 337 | 0     | 0   | 172   | 181 | 356  | 364 | 179   | 179 | 223  | 223 | 275  | 275 | 235  | 235 | 0    | 0   | 218  | 218 |
| 39  | 763 | ✓   |      |        | 182   | 182 | 252  | 252 | 327   | 337 | 0     | 0   | 172   | 171 | 357  | 365 | 179   | 179 | 224  | 224 | 275  | 275 | 235  | 242 | 0    | 0   | 218  | 218 |
| 40  | 764 |     | ✓    |        | 179   | 182 | 232  | 232 | 327   | 337 | 191   | 200 | 172   | 181 | 347  | 357 | 178   | 179 | 224  | 224 | 275  | 275 | 235  | 235 | 0    | 0   | 0    | 0   |
| 41  | 765 | ✓   |      |        | 176   | 183 | 0    | 0   | 334   | 336 | 188   | 193 | 172   | 178 | 346  | 374 | 178   | 185 | 223  | 223 | 275  | 275 | 219  | 235 | 193  | 193 | 0    | 0   |
| 42  | 766 | ✓   |      |        | 176   | 178 | 232  | 254 | 334   | 334 | 193   | 197 | 172   | 178 | 0    | 0   | 178   | 185 | 223  | 223 | 278  | 275 | 0    | 0   | 0    | 0   | 193  | 193 |
| 43  | 767 | ✓   |      |        | 178   | 183 | 0    | 0   | 336   | 336 | 189   | 193 | 172   | 178 | 346  | 374 | 178   | 185 | 223  | 223 | 275  | 275 | 219  | 235 | 193  | 193 | 0    | 0   |
| 44  | 768 |     | ✓    |        | 179   | 183 | 232  | 254 | 329   | 337 | 191   | 197 | 181   | 181 | 346  | 346 | 178   | 191 | 223  | 223 | 275  | 277 | 219  | 235 | 197  | 197 | 197  | 217 |
| 45  | 769 |     | ✓    |        | 178   | 182 | 232  | 232 | 331   | 331 | 191   | 197 | 178   | 181 | 346  | 346 | 178   | 191 | 223  | 223 | 275  | 275 | 235  | 238 | 0    | 0   | 197  | 217 |
| 46  | 770 |     | ✓    |        | 179   | 179 | 232  | 253 | 337   | 337 | 191   | 197 | 172   | 181 | 356  | 356 | 178   | 178 | 223  | 223 | 235  | 275 | 219  | 235 | 197  | 197 | 197  | 218 |
| 47  | 771 | ✓   |      |        | 182   | 182 | 233  | 253 | 332   | 332 | 189   | 191 | 0     | 0   | 0    | 0   | 0     | 0   | 0    | 0   | 275  | 275 | 235  | 235 | 0    | 0   | 217  | 218 |
| 48  | 772 |     | ✓    |        | 182   | 182 | 254  | 254 | 327   | 327 | 191   | 191 | 181   | 181 | 347  | 347 | 0     | 0   | 224  | 224 | 275  | 275 | 235  | 235 | 0    | 0   | 217  | 217 |
| 56  | 780 |     | ✓    |        | 182   | 182 | 233  | 233 | 327   | 327 | 0     | 0   | 172   | 178 | 347  | 357 | 0     | 0   | 224  | 224 | 275  | 275 | 235  | 235 | 193  | 193 | 193  | 217 |

|     |     |   |   |     |     |     |     |     |     |     |     |     |     |     |     |     |     |     |     |     |     |     |     |     |     |     |     |
|-----|-----|---|---|-----|-----|-----|-----|-----|-----|-----|-----|-----|-----|-----|-----|-----|-----|-----|-----|-----|-----|-----|-----|-----|-----|-----|-----|
| 57  | 781 | ✓ |   | 183 | 183 | 0   | 0   | 334 | 336 | 188 | 191 | 172 | 178 | 0   | 0   | 165 | 178 | 206 | 223 | 256 | 275 | 235 | 235 | 197 | 197 | 0   | 0   |
| 65  | 789 | ✓ |   | 176 | 183 | 232 | 232 | 335 | 335 | 188 | 191 | 177 | 177 | 0   | 0   | 165 | 178 | 0   | 0   | 275 | 275 | 0   | 0   | 195 | 195 | 0   | 0   |
| 66  | 790 | ✓ |   | 183 | 183 | 254 | 254 | 334 | 334 | 188 | 188 | 172 | 178 | 346 | 364 | 175 | 178 | 0   | 0   | 275 | 275 | 235 | 238 | 185 | 195 | 0   | 0   |
| 67  | 791 |   | ✓ | 176 | 183 | 0   | 0   | 334 | 334 | 191 | 191 | 170 | 172 | 346 | 364 | 175 | 178 | 0   | 0   | 275 | 279 | 235 | 238 | 185 | 195 | 217 | 217 |
| 68  | 792 | ✓ |   | 177 | 182 | 232 | 254 | 329 | 329 | 195 | 195 | 178 | 180 | 346 | 346 | 185 | 191 | 0   | 0   | 256 | 275 | 235 | 235 | 197 | 197 | 197 | 217 |
| 69  | 793 |   | ✓ | 176 | 182 | 232 | 254 | 323 | 323 | 186 | 191 | 176 | 185 | 354 | 385 | 178 | 185 | 223 | 223 | 275 | 275 | 240 | 240 | 0   | 0   | 197 | 217 |
| 70  | 794 | ✓ |   | 182 | 182 | 232 | 232 | 334 | 334 | 0   | 0   | 176 | 176 | 346 | 385 | 179 | 179 | 223 | 223 | 275 | 275 | 235 | 235 | 0   | 0   | 197 | 218 |
| 71  | 795 | ✓ |   | 182 | 182 | 233 | 254 | 323 | 330 | 186 | 191 | 178 | 178 | 379 | 385 | 176 | 179 | 224 | 224 | 275 | 275 | 235 | 235 | 0   | 0   | 197 | 217 |
| 72  | 796 |   | ✓ | 179 | 182 | 252 | 254 | 330 | 337 | 0   | 0   | 176 | 176 | 347 | 363 | 176 | 179 | 224 | 224 | 275 | 275 | 235 | 235 | 195 | 195 | 197 | 217 |
| 73  | 797 |   | ✓ | 178 | 182 | 232 | 232 | 330 | 330 | 191 | 191 | 178 | 178 | 374 | 379 | 178 | 191 | 223 | 223 | 275 | 277 | 235 | 235 | 195 | 195 | 0   | 0   |
| 75  | 799 | ✓ |   | 179 | 181 | 232 | 232 | 0   | 0   | 0   | 0   | 177 | 178 | 343 | 368 | 0   | 0   | 219 | 223 | 275 | 275 | 234 | 238 | 195 | 195 | 217 | 217 |
| 79  | 803 |   | ✓ | 182 | 182 | 233 | 254 | 323 | 330 | 191 | 191 | 178 | 178 | 0   | 0   | 0   | 0   | 224 | 224 | 275 | 275 | 235 | 238 | 195 | 195 | 197 | 217 |
| 80  | 804 | ✓ |   | 182 | 182 | 232 | 254 | 323 | 330 | 191 | 191 | 178 | 178 | 347 | 379 | 179 | 179 | 224 | 224 | 235 | 275 | 219 | 235 | 197 | 197 | 197 | 217 |
| 88  | 812 | ✓ |   | 182 | 182 | 232 | 254 | 337 | 337 | 191 | 191 | 178 | 185 | 347 | 379 | 179 | 192 | 224 | 224 | 275 | 275 | 235 | 235 | 0   | 0   | 197 | 217 |
| 89  | 813 | ✓ |   | 176 | 183 | 232 | 232 | 330 | 336 | 191 | 191 | 178 | 178 | 0   | 0   | 165 | 178 | 223 | 223 | 0   | 0   | 0   | 0   | 195 | 195 | 0   | 0   |
| 90  | 814 | ✓ |   | 176 | 183 | 232 | 232 | 0   | 0   | 194 | 194 | 174 | 178 | 346 | 356 | 178 | 191 | 223 | 223 | 0   | 0   | 0   | 0   | 195 | 195 | 0   | 0   |
| 91  | 815 |   | ✓ | 177 | 182 | 0   | 0   | 336 | 336 | 191 | 191 | 0   | 0   | 0   | 0   | 0   | 0   | 0   | 0   | 0   | 0   | 0   | 0   | 195 | 195 | 0   | 0   |
| 92  | 816 |   |   | 177 | 182 | 232 | 232 | 330 | 330 | 189 | 191 | 178 | 178 | 374 | 379 | 178 | 191 | 223 | 223 | 275 | 275 | 235 | 235 | 195 | 195 | 0   | 0   |
| 93  | 817 |   |   | 182 | 182 | 0   | 0   | 337 | 337 | 191 | 200 | 178 | 178 | 346 | 374 | 173 | 179 | 223 | 223 | 275 | 275 | 0   | 0   | 195 | 195 | 0   | 0   |
| 94  | 818 |   |   | 177 | 182 | 232 | 232 | 332 | 337 | 189 | 191 | 178 | 178 | 376 | 380 | 178 | 178 | 223 | 223 | 275 | 275 | 0   | 0   | 195 | 195 | 0   | 0   |
| 95  | 819 |   |   | 177 | 177 | 233 | 254 | 323 | 335 | 191 | 200 | 178 | 178 | 0   | 0   | 179 | 179 | 224 | 224 | 0   | 0   | 0   | 0   | 185 | 185 | 0   | 0   |
| 96  | 820 |   |   | 182 | 182 | 232 | 232 | 330 | 332 | 189 | 191 | 176 | 176 | 356 | 364 | 178 | 185 | 224 | 224 | 0   | 0   | 0   | 0   | 189 | 191 | 0   | 0   |
| 97  | 821 |   |   |     |     |     |     | 322 | 322 | 191 | 191 |     |     |     |     | 182 | 191 | 219 | 219 | 275 | 275 | 235 | 235 | 194 | 195 | 217 | 217 |
| 99  | 823 |   |   | 178 | 183 | 233 | 233 | 329 | 329 | 191 | 200 | 0   | 0   | 0   | 0   | 185 | 191 | 223 | 223 | 275 | 275 | 235 | 235 | 194 | 195 | 217 | 217 |
| 100 | 824 |   |   | 178 | 183 | 233 | 233 | 329 | 329 | 191 | 200 | 0   | 0   | 0   | 0   | 182 | 191 | 223 | 223 | 275 | 275 | 235 | 235 | 194 | 194 | 217 | 217 |
| 101 | 825 |   |   | 178 | 183 | 233 | 233 | 0   | 0   | 0   | 0   | 0   | 0   | 0   | 0   | 182 | 192 | 223 | 223 | 275 | 275 | 234 | 234 | 0   | 0   | 218 | 218 |
| 102 | 826 |   |   | 178 | 183 | 233 | 233 | 323 | 336 | 191 | 191 | 179 | 179 | 0   | 0   | 178 | 191 | 223 | 223 | 275 | 275 | 235 | 235 | 0   | 0   | 218 | 218 |
| 103 | 827 |   |   | 183 | 183 | 0   | 0   | 0   | 0   | 191 | 197 | 178 | 178 | 369 | 389 | 179 | 192 | 223 | 223 | 275 | 275 | 235 | 238 | 191 | 197 | 218 | 218 |
| 104 | 828 |   |   | 0   | 0   | 233 | 233 | 336 | 336 | 191 | 200 | 179 | 179 | 367 | 367 | 185 | 191 | 223 | 223 | 275 | 275 | 235 | 235 | 195 | 195 | 218 | 218 |
| 108 | 832 |   |   | 178 | 183 | 0   | 0   | 329 | 329 | 191 | 191 | 178 | 178 | 0   | 0   | 185 | 191 | 223 | 223 | 275 | 275 | 234 | 234 | 197 | 197 | 217 | 217 |
| 109 | 833 |   |   | 178 | 183 | 233 | 233 | 329 | 329 | 191 | 191 | 0   | 0   | 0   | 0   | 182 | 191 | 219 | 219 | 275 | 275 | 235 | 235 | 197 | 197 | 218 | 218 |
| 110 | 834 |   |   | 178 | 183 | 232 | 254 | 322 | 329 | 189 | 191 | 176 | 178 | 344 | 365 | 182 | 191 | 220 | 220 | 275 | 275 | 235 | 235 | 195 | 197 | 218 | 218 |
| 111 | 835 |   |   | 178 | 183 | 233 | 233 | 323 | 323 | 189 | 191 | 176 | 176 | 347 | 365 | 191 | 191 | 223 | 223 | 0   | 0   | 0   | 0   | 0   | 0   | 0   | 0   |
| 112 | 836 |   |   | 179 | 183 | 233 | 233 | 322 | 336 | 189 | 191 | 176 | 176 | 347 | 365 | 185 | 191 | 223 | 223 | 275 | 275 | 235 | 240 | 195 | 217 | 218 | 218 |
| 116 | 840 |   |   | 178 | 183 | 233 | 233 | 319 | 333 | 189 | 197 | 176 | 176 | 355 | 355 | 178 | 191 | 223 | 223 | 275 | 275 | 0   | 0   | 185 | 195 | 202 | 217 |

|     |     |   |     |     |     |     |     |     |     |     |     |     |     |     |     |     |     |     |     |     |     |     |     |     |     |     |
|-----|-----|---|-----|-----|-----|-----|-----|-----|-----|-----|-----|-----|-----|-----|-----|-----|-----|-----|-----|-----|-----|-----|-----|-----|-----|-----|
| 117 | 841 |   | 178 | 183 | 233 | 233 | 319 | 336 | 189 | 191 | 176 | 176 | 355 | 355 | 178 | 191 | 223 | 223 | 275 | 275 | 0   | 0   | 185 | 195 | 202 | 217 |
| 123 | 847 |   | 183 | 183 | 0   | 0   | 0   | 0   | 188 | 189 | 176 | 176 | 0   | 0   | 178 | 185 | 223 | 223 | 275 | 275 | 235 | 238 | 0   | 0   | 217 | 217 |
| 124 | 848 |   | 183 | 183 | 0   | 0   | 334 | 334 | 188 | 191 | 172 | 179 | 346 | 346 | 175 | 178 | 223 | 223 | 0   | 0   | 0   | 0   | 0   | 0   | 0   | 0   |
| 125 | 849 |   | 176 | 183 | 233 | 233 | 319 | 330 | 189 | 195 | 179 | 179 | 0   | 0   | 185 | 191 | 223 | 223 | 275 | 275 | 235 | 235 | 195 | 195 | 217 | 217 |
| 126 | 850 |   | 0   | 0   | 0   | 0   | 322 | 329 | 189 | 195 | 0   | 0   | 0   | 0   | 0   | 0   | 0   | 0   | 275 | 275 | 235 | 235 | 195 | 195 | 218 | 218 |
| 127 | 851 |   | 183 | 183 | 255 | 255 | 322 | 322 | 189 | 191 | 176 | 176 | 347 | 376 | 178 | 178 | 223 | 223 | 275 | 275 | 235 | 238 | 191 | 195 | 218 | 218 |
| 128 | 852 |   | 183 | 183 | 232 | 232 | 328 | 334 | 189 | 191 | 176 | 179 | 357 | 365 | 178 | 185 | 223 | 223 | 275 | 275 | 235 | 235 | 191 | 195 | 217 | 217 |
| 131 | 855 |   | 183 | 183 | 233 | 233 | 329 | 330 | 188 | 188 | 176 | 176 | 0   | 0   | 178 | 185 | 223 | 223 | 275 | 275 | 235 | 235 | 0   | 0   | 217 | 217 |
| 134 | 858 |   | 183 | 183 | 233 | 233 | 323 | 329 | 189 | 191 | 172 | 172 | 356 | 364 | 178 | 191 | 224 | 224 | 275 | 275 | 235 | 238 | 185 | 195 | 218 | 218 |
| 135 | 859 |   | 178 | 183 | 233 | 233 | 329 | 336 | 189 | 191 | 170 | 176 | 356 | 365 | 178 | 191 | 223 | 223 | 275 | 275 | 235 | 235 | 191 | 195 | 218 | 218 |
| 136 | 860 |   | 183 | 183 | 233 | 233 | 334 | 336 | 189 | 195 | 174 | 176 | 346 | 357 | 178 | 178 | 223 | 223 | 275 | 275 | 235 | 235 | 195 | 217 | 217 | 217 |
| 140 | 864 |   | 178 | 178 | 232 | 232 | 322 | 322 | 188 | 191 | 179 | 179 | 346 | 356 | 178 | 191 | 223 | 223 | 0   | 0   | 0   | 0   | 0   | 0   | 0   | 0   |
| 141 | 865 |   | 183 | 183 | 233 | 233 | 323 | 336 | 189 | 198 | 176 | 176 | 356 | 364 | 178 | 188 | 223 | 223 | 275 | 275 | 0   | 0   | 191 | 195 | 217 | 217 |
| 144 | 868 |   | 183 | 183 | 254 | 254 | 319 | 329 | 189 | 191 | 0   | 0   | 344 | 375 | 175 | 178 | 223 | 223 | 0   | 0   | 0   | 0   | 0   | 0   | 0   | 0   |
| 147 | 871 |   | 183 | 183 | 233 | 233 | 329 | 330 | 188 | 188 | 176 | 176 | 0   | 0   | 178 | 185 | 223 | 223 | 275 | 275 | 235 | 235 | 0   | 0   | 217 | 217 |
| 148 | 872 |   | 176 | 183 | 0   | 0   | 334 | 334 | 191 | 191 | 172 | 179 | 346 | 374 | 175 | 178 | 223 | 223 | 275 | 275 | 234 | 235 | 0   | 0   | 217 | 217 |
| 151 | 873 |   | 183 | 183 | 233 | 233 | 326 | 336 | 191 | 191 | 0   | 0   | 0   | 0   | 0   | 0   | 0   | 0   | 275 | 275 | 235 | 235 | 0   | 0   | 217 | 217 |
| 152 | 874 |   | 0   | 0   | 233 | 233 | 336 | 336 | 191 | 191 | 181 | 181 | 346 | 346 | 178 | 178 | 224 | 224 | 275 | 275 | 235 | 235 | 0   | 0   | 217 | 217 |
| 153 | 875 |   | 176 | 183 | 0   | 0   | 334 | 334 | 191 | 191 | 172 | 179 | 346 | 374 | 175 | 178 | 223 | 223 | 275 | 275 | 235 | 235 | 0   | 0   | 217 | 217 |
| 157 | 879 |   | 183 | 183 | 233 | 233 | 0   | 0   | 0   | 0   | 181 | 181 | 0   | 0   | 178 | 191 | 223 | 223 | 275 | 275 | 0   | 0   | 0   | 0   | 217 | 217 |
| 158 | 880 |   | 178 | 183 | 233 | 233 | 336 | 336 | 191 | 191 | 172 | 172 | 0   | 0   | 178 | 178 | 223 | 223 | 275 | 275 | 234 | 234 | 195 | 195 | 217 | 217 |
| 159 | 881 |   | 178 | 183 | 233 | 233 | 336 | 336 | 191 | 191 | 172 | 172 | 0   | 0   | 178 | 178 | 223 | 223 | 275 | 275 | 234 | 234 | 195 | 195 | 217 | 217 |
| 160 | 882 |   | 178 | 183 | 233 | 233 | 338 | 338 | 191 | 191 | 172 | 179 | 356 | 364 | 178 | 191 | 223 | 223 | 275 | 277 | 232 | 232 | 195 | 195 | 217 | 217 |
| 161 | 883 |   | 178 | 183 | 0   | 0   | 0   | 0   | 191 | 191 | 172 | 179 | 0   | 0   | 178 | 191 | 223 | 223 | 275 | 275 | 235 | 235 | 194 | 194 | 217 | 217 |
| 162 | 884 |   | 181 | 181 | 233 | 233 | 319 | 336 | 191 | 200 | 172 | 179 | 346 | 356 | 178 | 185 | 223 | 223 | 275 | 275 | 235 | 242 | 191 | 195 | 217 | 217 |
| 166 | 888 |   | 0   | 0   | 233 | 233 | 336 | 336 | 191 | 191 | 181 | 181 | 346 | 346 | 178 | 178 | 224 | 224 | 275 | 275 | 235 | 235 | 0   | 0   | 217 | 217 |
| 176 | 898 | ✓ | 179 | 181 | 232 | 233 | 334 | 334 | 189 | 189 | 0   | 0   | 346 | 355 | 0   | 0   | 223 | 223 | 275 | 275 | 234 | 238 | 0   | 0   | 217 | 217 |
| 177 | 899 | ✓ | 183 | 183 | 233 | 233 | 322 | 322 | 189 | 189 | 176 | 176 | 347 | 375 | 178 | 191 | 223 | 223 | 275 | 275 | 235 | 238 | 191 | 195 | 217 | 217 |
| 178 | 900 | ✓ | 183 | 183 | 233 | 233 | 323 | 323 | 191 | 191 | 0   | 0   | 0   | 0   | 0   | 0   | 0   | 0   | 275 | 275 | 235 | 235 | 0   | 0   | 217 | 217 |
| 180 | 902 | ✓ | 183 | 183 | 233 | 233 | 319 | 319 | 189 | 189 | 176 | 176 | 348 | 355 | 178 | 191 | 223 | 223 | 275 | 275 | 235 | 237 | 195 | 195 | 217 | 217 |
| 181 | 903 | ✓ | 183 | 183 | 232 | 232 | 322 | 322 | 189 | 198 | 170 | 176 | 348 | 355 | 178 | 191 | 223 | 223 | 275 | 275 | 235 | 235 | 185 | 195 | 217 | 217 |
| 182 | 904 | ✓ | 183 | 183 | 233 | 233 | 322 | 322 | 188 | 188 | 170 | 172 | 346 | 356 | 178 | 185 | 223 | 223 | 275 | 275 | 234 | 234 | 0   | 0   | 217 | 217 |
| 183 | 905 | ✓ | 183 | 183 | 233 | 233 | 319 | 319 | 189 | 189 | 176 | 176 | 348 | 355 | 178 | 191 | 223 | 223 | 275 | 275 | 235 | 237 | 195 | 195 | 217 | 217 |
| 184 | 906 | ✓ | 179 | 181 | 232 | 232 | 319 | 336 | 192 | 192 | 171 | 177 | 346 | 355 | 178 | 180 | 223 | 223 | 275 | 275 | 234 | 234 | 194 | 194 | 217 | 217 |
| 185 | 907 | ✓ | 183 | 183 | 233 | 233 | 319 | 319 | 189 | 191 | 170 | 177 | 348 | 354 | 178 | 178 | 224 | 224 | 275 | 288 | 235 | 238 | 0   | 0   | 217 | 217 |

|     |     |    |       |     |     |     |     |     |     |     |     |     |     |     |     |     |     |     |     |     |     |     |     |     |     |     |     |
|-----|-----|----|-------|-----|-----|-----|-----|-----|-----|-----|-----|-----|-----|-----|-----|-----|-----|-----|-----|-----|-----|-----|-----|-----|-----|-----|-----|
| 188 | 910 | ✓  |       | 183 | 183 | 233 | 233 | 322 | 322 | 188 | 188 | 0   | 0   | 0   | 0   | 0   | 0   | 0   | 0   | 275 | 275 | 238 | 238 | 0   | 0   | 0   | 0   |
| 189 | 911 |    | ✓     | 183 | 183 | 233 | 233 | 322 | 322 | 188 | 188 | 170 | 172 | 346 | 356 | 178 | 185 | 223 | 223 | 275 | 275 | 238 | 238 | 0   | 0   | 217 | 217 |
| 197 | 915 | ✓  |       | 183 | 183 | 232 | 232 | 322 | 322 | 189 | 198 | 170 | 176 | 348 | 355 | 178 | 191 | 223 | 223 | 275 | 275 | 235 | 235 | 185 | 195 | 217 | 217 |
| 205 | 924 | ✓  |       | 181 | 183 | 0   | 0   | 330 | 334 | 186 | 189 | 0   | 0   | 0   | 0   | 179 | 179 | 224 | 224 | 275 | 275 | 235 | 235 | 194 | 194 | 218 | 218 |
| 206 | 925 | ✓  |       | 0   | 0   | 232 | 232 | 336 | 336 | 0   | 0   | 171 | 177 | 0   | 0   | 180 | 191 | 223 | 223 | 275 | 277 | 234 | 234 | 194 | 196 | 217 | 217 |
| 207 | 926 | ✓  |       | 176 | 176 | 0   | 0   | 324 | 324 | 185 | 188 | 0   | 0   | 0   | 0   | 179 | 191 | 223 | 223 | 275 | 275 | 235 | 235 | 0   | 0   | 217 | 217 |
| 208 | 927 |    | ✓     | 178 | 183 | 232 | 232 | 330 | 330 | 189 | 189 | 176 | 178 | 0   | 0   | 179 | 191 | 219 | 219 | 275 | 275 | 235 | 235 | 0   | 0   | 217 | 217 |
| 209 | 928 | ✓  |       | 183 | 183 | 233 | 233 | 0   | 0   | 186 | 189 | 176 | 176 | 343 | 366 | 179 | 191 | 219 | 219 | 275 | 275 | 235 | 235 | 194 | 194 | 217 | 217 |
| 210 | 929 |    | unkow | 180 | 183 | 0   | 0   | 324 | 337 | 183 | 189 | 176 | 178 | 343 | 364 | 179 | 194 | 223 | 223 | 275 | 278 | 235 | 235 | 196 | 196 | 218 | 218 |
| 211 | 930 |    | ✓     | 183 | 183 | 233 | 233 | 333 | 337 | 183 | 189 | 180 | 180 | 343 | 343 | 179 | 191 | 220 | 220 | 275 | 275 | 235 | 235 | 196 | 196 | 218 | 218 |
| 212 | 931 | ✓  |       | 183 | 183 | 233 | 233 | 325 | 325 | 189 | 195 | 172 | 172 | 347 | 347 | 179 | 192 | 220 | 220 | 275 | 275 | 235 | 235 | 190 | 194 | 218 | 218 |
| 213 | 932 | ✓  |       | 183 | 183 | 233 | 233 | 325 | 325 | 189 | 195 | 0   | 0   | 345 | 347 | 175 | 178 | 0   | 0   | 275 | 275 | 235 | 235 | 190 | 194 | 241 | 241 |
| 214 | 933 | ✓  |       | 183 | 183 | 0   | 0   | 325 | 333 | 189 | 189 | 178 | 178 | 344 | 367 | 179 | 191 | 219 | 219 | 278 | 275 | 235 | 235 | 196 | 196 | 218 | 218 |
| 216 | 935 | ✓  |       | 179 | 181 | 0   | 0   | 336 | 336 | 192 | 192 | 171 | 177 | 0   | 0   | 180 | 185 | 223 | 223 | 275 | 280 | 234 | 234 | 194 | 194 | 217 | 217 |
| 217 | 936 | ✓  |       | 0   | 0   | 232 | 232 | 330 | 330 | 0   | 0   | 176 | 180 | 346 | 346 | 179 | 191 | 219 | 219 | 0   | 0   | 235 | 235 | 0   | 0   | 217 | 217 |
| 218 | 937 | ✓  |       | 0   | 0   | 0   | 0   | 0   | 0   | 0   | 0   | 178 | 180 | 346 | 391 | 182 | 191 | 219 | 219 | 275 | 275 | 235 | 235 | 0   | 0   | 217 | 217 |
| 219 | 938 |    | ✓     | 183 | 183 | 233 | 233 | 324 | 324 | 189 | 189 | 176 | 178 | 343 | 346 | 179 | 191 | 219 | 219 | 275 | 275 | 235 | 235 | 194 | 196 | 218 | 218 |
| 220 | 939 | ✓  |       | 183 | 183 | 233 | 233 | 330 | 330 | 189 | 189 | 176 | 178 | 346 | 366 | 179 | 191 | 224 | 224 | 275 | 275 | 235 | 235 | 196 | 196 | 218 | 218 |
| 221 | 940 | ✓  |       | 183 | 183 | 0   | 0   | 325 | 330 | 189 | 195 | 176 | 180 | 344 | 344 | 186 | 192 | 220 | 220 | 275 | 275 | 235 | 235 | 196 | 196 | 218 | 218 |
| 222 | 941 |    | unkow | 183 | 183 | 0   | 0   | 325 | 332 | 189 | 189 | 178 | 178 | 344 | 390 | 179 | 191 | 220 | 220 | 0   | 0   | 0   | 0   | 0   | 0   | 0   | 0   |
| 223 | 942 |    | ✓     | 183 | 183 | 233 | 233 | 329 | 329 | 189 | 189 | 176 | 180 | 347 | 390 | 179 | 191 | 219 | 219 | 275 | 275 | 235 | 235 | 194 | 196 | 218 | 218 |
| 224 | 943 | ✓  |       | 0   | 0   | 232 | 232 | 324 | 324 | 0   | 0   | 0   | 0   | 0   | 0   | 191 | 191 | 219 | 219 | 278 | 275 | 235 | 235 | 196 | 196 | 217 | 217 |
| 226 | 945 | ✓  |       | 183 | 183 | 233 | 233 | 0   | 0   | 186 | 189 | 176 | 176 | 343 | 366 | 179 | 191 | 219 | 219 | 275 | 275 | 235 | 235 | 194 | 194 | 217 | 217 |
| 227 | 946 | ✓  |       | 180 | 183 | 233 | 255 | 329 | 337 | 189 | 189 | 178 | 178 | 343 | 343 | 185 | 191 | 223 | 223 | 278 | 275 | 235 | 235 | 194 | 194 | 218 | 218 |
| 233 | 951 | 3  |       | 0   | 0   | 233 | 233 | 328 | 338 | 186 | 189 | 176 | 180 | 0   | 0   | 179 | 182 | 219 | 219 | 278 | 275 | 235 | 235 | 194 | 194 | 217 | 217 |
| 234 | 952 | 4  |       | 0   | 0   | 0   | 0   | 338 | 338 | 186 | 189 | 0   | 0   | 343 | 343 | 185 | 191 | 219 | 219 | 275 | 275 | 235 | 235 | 194 | 196 | 217 | 217 |
| 235 | 953 | 5  |       | 183 | 183 | 233 | 233 | 332 | 338 | 186 | 195 | 178 | 178 | 366 | 366 | 179 | 191 | 219 | 219 | 275 | 275 | 234 | 235 | 194 | 196 | 217 | 217 |
| 236 | 954 | 6  |       | 0   | 0   | 0   | 0   | 338 | 338 | 186 | 189 | 0   | 0   | 343 | 343 | 179 | 191 | 224 | 224 | 275 | 275 | 235 | 235 | 196 | 196 | 218 | 218 |
| 237 | 955 | 7  |       | 183 | 183 | 233 | 233 | 332 | 332 | 186 | 186 | 176 | 176 | 343 | 346 | 179 | 191 | 219 | 219 | 275 | 275 | 235 | 235 | 196 | 196 | 218 | 218 |
| 238 | 956 | 8  |       | 183 | 183 | 233 | 233 | 338 | 338 | 186 | 189 | 178 | 178 | 344 | 367 | 179 | 182 | 219 | 219 | 275 | 275 | 235 | 235 | 194 | 194 | 218 | 218 |
| 239 | 957 | 9  |       | 181 | 183 | 233 | 233 | 333 | 337 | 189 | 192 | 176 | 176 | 347 | 347 | 179 | 191 | 219 | 219 | 275 | 275 | 235 | 235 | 195 | 197 | 218 | 218 |
| 240 | 958 | 10 |       | 183 | 183 | 233 | 233 | 329 | 337 | 186 | 189 | 176 | 180 | 367 | 367 | 185 | 191 | 219 | 219 | 275 | 275 | 235 | 235 | 195 | 197 | 218 | 218 |
| 242 | 960 | 12 |       | 0   | 0   | 0   | 0   | 328 | 328 | 189 | 195 | 180 | 180 | 343 | 343 | 179 | 191 | 219 | 219 | 275 | 275 | 235 | 235 | 195 | 195 | 217 | 217 |
| 243 | 961 | 13 |       | 0   | 0   | 0   | 0   | 0   | 0   | 186 | 195 | 176 | 176 | 343 | 343 | 179 | 191 | 223 | 223 | 275 | 275 | 235 | 235 | 197 | 197 | 217 | 217 |
| 244 | 962 | 14 |       | 183 | 183 | 0   | 0   | 0   | 0   | 186 | 189 | 176 | 180 | 343 | 343 | 179 | 191 | 220 | 220 | 275 | 275 | 235 | 235 | 195 | 195 | 218 | 218 |

|     |      |         |     |     |     |     |     |     |     |     |     |     |     |     |     |     |     |     |     |     |     |     |     |     |     |     |
|-----|------|---------|-----|-----|-----|-----|-----|-----|-----|-----|-----|-----|-----|-----|-----|-----|-----|-----|-----|-----|-----|-----|-----|-----|-----|-----|
| 245 | 963  | 15      | 183 | 183 | 233 | 233 | 329 | 329 | 189 | 189 | 176 | 178 | 346 | 346 | 179 | 191 | 223 | 223 | 0   | 0   | 235 | 235 | 195 | 195 | 218 | 218 |
| 246 | 964  | 16      | 0   | 0   | 0   | 0   | 333 | 333 | 189 | 189 | 178 | 180 | 346 | 346 | 175 | 191 | 219 | 219 | 275 | 275 | 235 | 235 | 195 | 197 | 218 | ### |
| 247 | 965  | 17      | 183 | 183 | 233 | 233 | 329 | 329 | 186 | 189 | 0   | 0   | 347 | 367 | 179 | 191 | 219 | 220 | 275 | 275 | 235 | 235 | 195 | 195 | 218 | 218 |
| 250 | 968  | 20      | 0   | 0   | 233 | 233 | 0   | 0   | 0   | 0   | 176 | 180 | 343 | 343 | 179 | 182 | 219 | 219 | 275 | 275 | 235 | 235 | 195 | 195 | 217 | 217 |
| 251 | 969  | 21      | 178 | 183 | 233 | 233 | 338 | 338 | 189 | 189 | 176 | 178 | 346 | 366 | 179 | 191 | 223 | 223 | 275 | 275 | 235 | 235 | 195 | 195 | 217 | 217 |
| 252 | 970  | 22      | 0   | 0   | 233 | 233 | 0   | 0   | 0   | 0   | 176 | 180 | 346 | 346 | 185 | 191 | 220 | 220 | 275 | 275 | 235 | 235 | 0   | 0   | 218 | 218 |
| 253 | 971  | 23      | 0   | 0   | 233 | 233 | 0   | 0   | 0   | 0   | 0   | 0   | 346 | 366 | 179 | 191 | 223 | 223 | 275 | 275 | 235 | 235 | 195 | 197 | 218 | 218 |
| 254 | 972  | 24      | 0   | 0   | 233 | 233 | 0   | 0   | 0   | 0   | 178 | 178 | 343 | 366 | 179 | 192 | 220 | 220 | 251 | 275 | 235 | 235 | 195 | 197 | 218 | 218 |
| 255 | 973  | 25      | 0   | 0   | 233 | 233 | 0   | 0   | 0   | 0   | 0   | 0   | 347 | 367 | 185 | 191 | 220 | 220 | 276 | 276 | 235 | 235 | 195 | 197 | 218 | 218 |
| 256 | 974  | 26      | 0   | 0   | 233 | 233 | 0   | 0   | 0   | 0   | 178 | 178 | 347 | 347 | 175 | 179 | 223 | 223 | 275 | 275 | 235 | 238 | 191 | 197 | 218 | 218 |
| 257 | 975  | 27      | 0   | 0   | 0   | 0   | 328 | 328 | 189 | 195 | 180 | 180 | 343 | 343 | 179 | 191 | 219 | 219 | 275 | 275 | 235 | 235 | 195 | 195 | 217 | 217 |
| 260 | 978  | 30      | 183 | 183 | 233 | 233 | 339 | 339 | 186 | 189 | 176 | 178 | 346 | 346 | 179 | 191 | 219 | 219 | 275 | 275 | 235 | 235 | 197 | 197 | 218 | 218 |
| 261 | 979  | 31      | 183 | 183 | 233 | 233 | 329 | 329 | 189 | 189 | 178 | 178 | 346 | 346 | 175 | 191 | 219 | 219 | 275 | 275 | 235 | 235 | 185 | 197 | 218 | 218 |
| 262 | 980  | 32      | 183 | 183 | 233 | 233 | 0   | 0   | 189 | 195 | 176 | 178 | 343 | 364 | 179 | 194 | 223 | 223 | 275 | 275 | 235 | 235 | 197 | 197 | 218 | 218 |
| 266 | 984  | 36      | 178 | 183 | 233 | 233 | 338 | 338 | 189 | 189 | 176 | 178 | 346 | 366 | 179 | 191 | 223 | 223 | 275 | 275 | 235 | 235 | 195 | 195 | 217 | 217 |
| 270 | 988  | 40      | 183 | 183 | 233 | 233 | 329 | 338 | 189 | 189 | 176 | 176 | 343 | 366 | 192 | 192 | 219 | 219 | 275 | 275 | 235 | 235 | 195 | 197 | 218 | 218 |
| 271 | 989  | 41      | 183 | 183 | 0   | 0   | 333 | 338 | 186 | 189 | 0   | 0   | 344 | 344 | 186 | 192 | 220 | 220 | 275 | 275 | 235 | 235 | 195 | 195 | 218 | 218 |
| 272 | 990  | 42      | 183 | 183 | 233 | 233 | 329 | 329 | 186 | 189 | 176 | 176 | 347 | 347 | 175 | 175 | 0   | 0   | 275 | 275 | 235 | 238 | 191 | 191 | 0   | 0   |
| 273 | 991  | 43      | 0   | 0   | 0   | 0   | 0   | 0   | 189 | 195 | 180 | 180 | 343 | 343 | 179 | 191 | 219 | 219 | 275 | 275 | 235 | 235 | 195 | 195 | 217 | 217 |
| 274 | 992  | 44      | 178 | 183 | 233 | 233 | 331 | 331 | 186 | 195 | 176 | 176 | 0   | 0   | 182 | 191 | 219 | 219 | 275 | 275 | 235 | 235 | 191 | 197 | 218 | 218 |
| 277 | 995  | 47      | 180 | 183 | 233 | 233 | 338 | 338 | 186 | 195 | 174 | 180 | 0   | 0   | 191 | 191 | 223 | 223 | 275 | 275 | 235 | 235 | 197 | 197 | 218 | 218 |
| 278 | 996  | 48      | 183 | 183 | 233 | 233 | 333 | 338 | 189 | 189 | 176 | 176 | 346 | 346 | 179 | 191 | 223 | 223 | 275 | 275 | 235 | 235 | 191 | 195 | 218 | 218 |
| 279 | 997  | 49      | 183 | 183 | 233 | 233 | 337 | 337 | 186 | 189 | 0   | 0   | 346 | 346 | 176 | 176 | 220 | 220 | 275 | 275 | 233 | 238 | 195 | 195 | 218 | 218 |
| 280 | 998  | 50      | 183 | 183 | 233 | 233 | 337 | 337 | 189 | 189 | 174 | 180 | 347 | 347 | 179 | 191 | 223 | 223 | 275 | 275 | 235 | 235 | 191 | 195 | 218 | 218 |
| 281 | 1000 | 51      | 178 | 183 | 233 | 233 | 331 | 331 | 186 | 195 | 176 | 176 | 0   | 0   | 182 | 191 | 219 | 219 | 275 | 275 | 235 | 235 | 191 | 197 | 218 | 218 |
| 282 | 1001 | 52      | 183 | 183 | 233 | 233 | 332 | 338 | 189 | 192 | 0   | 0   | 0   | 0   | 182 | 191 | 219 | 219 | 275 | 275 | 235 | 235 | 197 | 197 | 218 | 218 |
| 283 | 1002 | 53      | 183 | 183 | 233 | 233 | 329 | 338 | 186 | 189 | 176 | 176 | 0   | 0   | 179 | 188 | 223 | 223 | 275 | 275 | 235 | 235 | 195 | 195 | 218 | 218 |
| 284 | 1003 | 54      | 183 | 183 | 233 | 233 | 333 | 333 | 186 | 186 | 180 | 180 | 0   | 0   | 179 | 179 | 223 | 223 | 275 | 275 | 235 | 235 | 195 | 197 | 218 | 218 |
| 285 | 1004 | 55      | 183 | 183 | 0   | 0   | 0   | 0   | 0   | 0   | 176 | 176 | 347 | 365 | 185 | 191 | 223 | 223 | 275 | 275 | 235 | 235 | 195 | 195 | 218 | 218 |
| 286 | 1005 | 56      | 183 | 183 | 0   | 0   | 338 | 338 | 186 | 189 | 178 | 178 | 367 | 367 | 175 | 182 | 220 | 220 | 275 | 275 | 235 | 235 | 197 | 197 | 218 | 218 |
| 287 | 1070 | ✓       | 183 | 183 | 0   | 0   | 0   | 0   | 189 | 189 | 176 | 176 | 347 | 375 | 179 | 185 | 223 | 223 | 275 | 275 | 235 | 235 | 191 | 195 | 217 | 217 |
| 289 | 1072 | ✓       | 183 | 183 | 233 | 233 | 0   | 0   | 189 | 189 | 170 | 170 | 0   | 0   | 185 | 188 | 219 | 219 | 275 | 275 | 235 | 235 | 191 | 195 | 0   | 0   |
| 290 | 1073 | ✓       | 183 | 183 | 233 | 233 | 0   | 0   | 189 | 189 | 178 | 178 | 0   | 0   | 179 | 185 | 223 | 223 | 275 | 275 | 235 | 235 | 185 | 195 | 0   | 0   |
| 291 | 1074 | monoecy | 183 | 183 | 233 | 233 | 0   | 0   | 189 | 189 | 182 | 182 | 346 | 346 | 179 | 179 | 223 | 223 | 275 | 275 | 235 | 238 | 191 | 199 | 0   | 0   |
| 292 | 1075 | ✓       | 183 | 183 | 233 | 233 | 0   | 0   | 189 | 189 | 170 | 170 | 346 | 346 | 175 | 179 | 223 | 223 | 275 | 275 | 235 | 235 | 191 | 199 | 0   | 0   |

|     |      |    |     |     |     |     |     |     |     |     |     |     |     |     |     |     |     |     |     |     |     |     |     |     |     |     |
|-----|------|----|-----|-----|-----|-----|-----|-----|-----|-----|-----|-----|-----|-----|-----|-----|-----|-----|-----|-----|-----|-----|-----|-----|-----|-----|
| 293 | 1076 | ✓  | 183 | 183 | 233 | 233 | 0   | 0   | 189 | 189 | 170 | 170 | 347 | 347 | 179 | 185 | 223 | 223 | 275 | 275 | 235 | 238 | 195 | 195 | 0   | 0   |
| 296 | 1079 | ✓  | 176 | 180 | 254 | 254 | 335 | 335 | 0   | 0   | 176 | 176 | 364 | 364 | 179 | 185 | 223 | 223 | 275 | 275 | 235 | 235 | 195 | 199 | 218 | 218 |
| 298 | 1081 | ✓  | 0   | 0   | 232 | 254 | 0   | 0   | 182 | 182 | 176 | 176 | 347 | 347 | 179 | 194 | 224 | 224 | 0   | 0   | 235 | 238 | 0   | 0   | 0   | 0   |
| 299 | 1082 | ✓  | 181 | 181 | 233 | 233 | 0   | 0   | 189 | 192 | 169 | 170 | 347 | 347 | 179 | 186 | 223 | 223 | 275 | 275 | 235 | 235 | 194 | 194 | 218 | 218 |
| 300 | 1083 | ✓  | 181 | 181 | 232 | 232 | 0   | 0   | 189 | 192 | 169 | 169 | 347 | 347 | 179 | 179 | 224 | 224 | 275 | 275 | 235 | 235 | 0   | 0   | 218 | 218 |
| 301 | 1084 | ✓  | 183 | 183 | 232 | 232 | 331 | 331 | 189 | 192 | 170 | 170 | 347 | 375 | 179 | 186 | 224 | 224 | 275 | 275 | 0   | 0   | 218 | 218 | 218 | 218 |
| 302 | 1085 | ✓  | 183 | 183 | 232 | 254 | 323 | 331 | 192 | 192 | 0   | 0   | 347 | 347 | 179 | 189 | 224 | 224 | 275 | 275 | 0   | 0   | 0   | 0   | 218 | 218 |
| 303 | 1086 | ✓  | 181 | 183 | 232 | 232 | 323 | 332 | 189 | 191 | 170 | 179 | 375 | 375 | 179 | 185 | 224 | 224 | 275 | 275 | 235 | 235 | 0   | 0   | 0   | 0   |
| 306 | 1089 | ✓  | 183 | 183 | 250 | 254 | 0   | 0   | 0   | 0   | 170 | 179 | 347 | 375 | 185 | 189 | 224 | 224 | 275 | 275 | 0   | 0   | 195 | 195 | 235 | 235 |
| 307 | 1090 | ✓  | 181 | 181 | 233 | 233 | 0   | 0   | 189 | 189 | 170 | 170 | 375 | 375 | 179 | 192 | 223 | 223 | 275 | 275 | 235 | 235 | 191 | 191 | 218 | 218 |
| 308 | 1091 | ✓  | 0   | 0   | 233 | 254 | 0   | 0   | 0   | 0   | 0   | 0   | 347 | 347 | 179 | 192 | 0   | 0   | 275 | 275 | 0   | 0   | 191 | 195 | 0   | 0   |
| 309 | 1092 | ✓  | 0   | 0   | 232 | 232 | 323 | 323 | 192 | 192 | 170 | 179 | 347 | 347 | 179 | 179 | 224 | 224 | 275 | 275 | 235 | 242 | 191 | 195 | 218 | 218 |
| 310 | 1093 |    | 181 | 181 | 232 | 257 | 322 | 322 | 189 | 192 | 181 | 181 | 347 | 347 | 178 | 185 | 224 | 224 | 275 | 275 | 235 | 235 | 191 | 195 | 218 | 218 |
| 312 | 1241 | ✓  | 0   | 0   | 0   | 0   | 328 | 328 | 191 | 191 | 0   | 0   | 347 | 347 | 175 | 179 | 0   | 0   | 275 | 275 | 235 | 235 | 190 | 194 | 217 | 217 |
| 313 | 1242 | ✓  | 0   | 0   | 232 | 232 | 322 | 334 | 191 | 198 | 0   | 0   | 347 | 347 | 175 | 179 | 0   | 0   | 275 | 275 | 235 | 238 | 194 | 199 | 217 | 217 |
| 314 | 1243 | ✓  | 0   | 0   | 233 | 233 | 322 | 334 | 191 | 191 | 0   | 0   | 347 | 347 | 175 | 179 | 0   | 0   | 275 | 275 | 238 | 238 | 195 | 199 | 217 | 217 |
| 315 | 1094 | 1  | 181 | 181 | 232 | 254 | 323 | 331 | 192 | 198 | 170 | 170 | 375 | 375 | 179 | 179 | 224 | 224 | 275 | 275 | 235 | 235 | 195 | 195 | 218 | 218 |
| 316 | 1095 | 2  | 182 | 184 | 233 | 255 | 322 | 322 | 191 | 191 | 169 | 177 | 346 | 346 | 175 | 179 | 223 | 223 | 275 | 275 | 235 | 235 | 191 | 195 | 217 | 217 |
| 317 | 1096 | 3  | 176 | 180 | 254 | 254 | 0   | 0   | 0   | 0   | 181 | 181 | 375 | 375 | 178 | 185 | 224 | 224 | 275 | 275 | 235 | 235 | 0   | 0   | 218 | 221 |
| 318 | 1097 | 4  | 181 | 183 | 232 | 232 | 322 | 322 | 192 | 192 | 170 | 176 | 347 | 375 | 179 | 185 | 224 | 224 | 275 | 275 | 235 | 235 | 0   | 0   | 218 | 218 |
| 319 | 1098 | 5  | 181 | 181 | 233 | 233 | 0   | 0   | 189 | 192 | 174 | 174 | 347 | 347 | 179 | 185 | 223 | 223 | 275 | 275 | 235 | 235 | 191 | 191 | 218 | 222 |
| 320 | 1099 | 6  | 183 | 183 | 233 | 233 | 0   | 0   | 189 | 192 | 0   | 0   | 347 | 347 | 179 | 186 | 223 | 223 | 275 | 275 | 235 | 235 | 195 | 195 | 218 | 218 |
| 322 | 1101 | 8  | 181 | 181 | 232 | 254 | 322 | 322 | 192 | 198 | 170 | 181 | 347 | 375 | 178 | 194 | 224 | 224 | 0   | 0   | 0   | 0   | 0   | 0   | 0   | 0   |
| 323 | 1102 | 9  | 181 | 183 | 232 | 275 | 330 | 335 | 189 | 192 | 173 | 173 | 347 | 375 | 179 | 188 | 224 | 224 | 275 | 275 | 235 | 238 | 0   | 0   | 218 | 218 |
| 324 | 1103 | 10 | 176 | 180 | 0   | 0   | 0   | 0   | 188 | 188 | 0   | 0   | 375 | 375 | 178 | 178 | 223 | 223 | 275 | 275 | 235 | 235 | 0   | 0   | 218 | 218 |
| 326 | 1105 | 12 | 176 | 180 | 233 | 255 | 0   | 0   | 189 | 192 | 170 | 170 | 347 | 375 | 178 | 178 | 223 | 223 | 275 | 275 | 235 | 235 | 0   | 0   | 218 | 218 |
| 329 | 1111 | 15 | 181 | 181 | 232 | 232 | 322 | 330 | 189 | 192 | 169 | 169 | 347 | 347 | 179 | 179 | 224 | 224 | 275 | 275 | 235 | 235 | 195 | 218 | 218 | 218 |
| 330 | 1112 | 16 | 181 | 181 | 0   | 0   | 323 | 323 | 189 | 192 | 0   | 0   | 0   | 0   | 178 | 185 | 224 | 224 | 275 | 275 | 235 | 238 | 195 | 195 | 218 | 218 |
| 333 | 1115 | 19 | 176 | 180 | 232 | 232 | 0   | 0   | 189 | 192 | 170 | 181 | 347 | 375 | 179 | 179 | 0   | 0   | 0   | 0   | 0   | 0   | 0   | 0   | 218 | 218 |
| 334 | 1116 | 20 | 181 | 183 | 232 | 232 | 322 | 322 | 189 | 192 | 173 | 179 | 347 | 347 | 179 | 185 | 0   | 0   | 275 | 275 | 235 | 235 | 0   | 0   | 218 | 218 |
| 335 | 1117 | 21 | 181 | 181 | 232 | 254 | 0   | 0   | 189 | 192 | 170 | 176 | 347 | 347 | 178 | 179 | 0   | 0   | 275 | 275 | 0   | 0   | 0   | 0   | 218 | 220 |
| 336 | 1118 | 22 | 181 | 183 | 232 | 275 | 329 | 331 | 189 | 192 | 0   | 0   | 0   | 0   | 0   | 0   | 0   | 0   | 275 | 275 | 242 | 242 | 0   | 0   | 218 | 218 |
| 337 | 1119 | 23 | 181 | 183 | 232 | 232 | 322 | 322 | 192 | 192 | 170 | 176 | 347 | 375 | 179 | 185 | 0   | 0   | 275 | 275 | 235 | 235 | 0   | 0   | 218 | 218 |
| 338 | 1120 | 24 | 181 | 181 | 232 | 232 | 329 | 329 | 192 | 198 | 0   | 0   | 347 | 375 | 179 | 188 | 0   | 0   | 275 | 275 | 235 | 235 | 0   | 0   | 218 | 218 |
| 339 | 1121 | 25 | 181 | 176 | 252 | 254 | 0   | 0   | 188 | 191 | 181 | 181 | 346 | 346 | 179 | 181 | 0   | 0   | 275 | 275 | 235 | 235 | 191 | 195 | 217 | 235 |

|     |      |    |     |     |     |     |     |     |     |     |     |     |     |     |     |     |     |     |     |     |     |     |     |     |     |     |
|-----|------|----|-----|-----|-----|-----|-----|-----|-----|-----|-----|-----|-----|-----|-----|-----|-----|-----|-----|-----|-----|-----|-----|-----|-----|-----|
| 340 | 1122 | 26 | 181 | 183 | 254 | 232 | 0   | 0   | 176 | 186 | 0   | 0   | 346 | 346 | 175 | 178 | 0   | 0   | 0   | 0   | 0   | 0   | 191 | 199 | 0   | 0   |
| 341 | 1123 | 27 | 176 | 182 | 254 | 254 | 323 | 323 | 188 | 196 | 170 | 181 | 346 | 375 | 175 | 178 | 223 | 223 | 275 | 275 | 235 | 235 | 185 | 191 | 217 | 217 |
| 342 | 1124 | 28 | 180 | 180 | 222 | 231 | 323 | 330 | 178 | 206 | 179 | 179 | 346 | 364 | 175 | 178 | 223 | 223 | 0   | 0   | 0   | 0   | 0   | 0   | 0   | 0   |
| 343 | 1125 | 29 | 170 | 176 | 223 | 223 | 323 | 323 | 207 | 186 | 170 | 176 | 375 | 375 | 178 | 185 | 223 | 223 | 275 | 275 | 235 | 238 | 191 | 199 | 0   | 0   |
| 344 | 1126 | 30 | 181 | 181 | 255 | 255 | 323 | 332 | 192 | 192 | 0   | 0   | 0   | 0   | 0   | 0   | 0   | 0   | 275 | 275 | 235 | 235 | 191 | 195 | 217 | 217 |
| 345 | 1127 | 31 | 181 | 181 | 255 | 255 | 0   | 0   | 0   | 0   | 170 | 179 | 347 | 375 | 179 | 185 | 223 | 223 | 275 | 275 | 235 | 235 | 191 | 191 | 217 | 217 |
| 346 | 1128 | 32 | 181 | 183 | 255 | 255 | 323 | 329 | 180 | 185 | 179 | 179 | 347 | 352 | 179 | 186 | 215 | 215 | 275 | 275 | 235 | 235 | 195 | 199 | 217 | 217 |
| 347 | 1129 | 33 | 176 | 180 | 0   | 0   | 323 | 323 | 0   | 0   | 179 | 179 | 0   | 0   | 179 | 191 | 223 | 223 | 275 | 275 | 235 | 235 | 191 | 195 | 217 | 235 |
| 348 | 1130 | 34 | 180 | 182 | 232 | 254 | 323 | 336 | 188 | 188 | 170 | 182 | 346 | 383 | 178 | 191 | 0   | 0   | 0   | 0   | 0   | 0   | 191 | 195 | 0   | 0   |
| 349 | 1131 | 35 | 176 | 182 | 232 | 232 | 323 | 331 | 191 | 191 | 170 | 172 | 375 | 375 | 179 | 185 | 223 | 223 | 275 | 275 | 235 | 235 | 191 | 195 | 217 | 235 |
| 350 | 1132 | 36 | 180 | 180 | 0   | 0   | 322 | 322 | 188 | 191 | 170 | 181 | 346 | 375 | 178 | 191 | 223 | 223 | 275 | 275 | 235 | 235 | 0   | 0   | 217 | 217 |
| 351 | 1133 | 37 | 180 | 180 | 232 | 253 | 330 | 338 | 192 | 197 | 0   | 0   | 0   | 0   | 0   | 0   | 0   | 0   | 275 | 275 | 235 | 235 | 0   | 0   | 217 | 217 |
| 352 | 1134 | 38 | 180 | 181 | 232 | 255 | 323 | 335 | 194 | 194 | 158 | 170 | 349 | 375 | 175 | 178 | 223 | 223 | 0   | 0   | 0   | 0   | 191 | 195 | 0   | 0   |
| 353 | 1135 | 39 | 178 | 178 | 255 | 255 | 324 | 324 | 191 | 201 | 164 | 177 | 349 | 375 | 180 | 186 | 223 | 223 | 275 | 275 | 235 | 235 | 191 | 191 | 0   | 0   |
| 354 | 1136 | 40 | 0   | 0   | 221 | 221 | 323 | 323 | 186 | 186 | 0   | 0   | 0   | 0   | 0   | 0   | 0   | 0   | 275 | 275 | 235 | 235 | 185 | 195 | 217 | 217 |
| 355 | 1137 | 41 | 176 | 180 | 232 | 232 | 336 | 336 | 188 | 188 | 172 | 172 | 0   | 0   | 178 | 175 | 223 | 223 | 275 | 275 | 0   | 0   | 191 | 195 | 217 | 217 |
| 356 | 1138 | 42 | 181 | 181 | 232 | 232 | 322 | 322 | 188 | 191 | 165 | 179 | 0   | 0   | 175 | 178 | 223 | 223 | 275 | 275 | 0   | 0   | 195 | 195 | 217 | 217 |
| 357 | 1139 | 43 | 182 | 182 | 232 | 232 | 334 | 334 | 188 | 191 | 0   | 0   | 375 | 375 | 0   | 0   | 223 | 223 | 275 | 277 | 0   | 0   | 191 | 195 | 217 | 217 |
| 358 | 1140 | 44 | 181 | 183 | 254 | 254 | 330 | 337 | 191 | 191 | 170 | 170 | 346 | 346 | 178 | 185 | 223 | 223 | 275 | 275 | 0   | 0   | 191 | 191 | 217 | 217 |
| 359 | 1141 | 45 | 182 | 182 | 232 | 254 | 323 | 332 | 192 | 192 | 0   | 0   | 0   | 0   | 0   | 0   | 0   | 0   | 275 | 275 | 0   | 0   | 191 | 191 | 217 | 217 |
| 360 | 1142 | 46 | 182 | 182 | 232 | 232 | 323 | 335 | 192 | 198 | 170 | 178 | 347 | 347 | 180 | 186 | 223 | 223 | 0   | 0   | 0   | 0   | 195 | 195 | 0   | 0   |
| 361 | 1143 | 47 | 183 | 183 | 0   | 0   | 325 | 325 | 189 | 189 | 176 | 176 | 347 | 375 | 179 | 185 | 223 | 223 | 275 | 275 | 235 | 235 | 191 | 195 | 217 | 217 |
| 362 | 1144 | 48 | 0   | 0   | 235 | 235 | 323 | 329 | 192 | 192 | 0   | 0   | 0   | 0   | 0   | 0   | 0   | 0   | 275 | 275 | 0   | 0   | 191 | 195 | 217 | 217 |
| 363 | 1145 | 49 | 176 | 180 | 232 | 254 | 323 | 323 | 188 | 188 | 170 | 178 | 346 | 346 | 179 | 191 | 192 | 223 | 275 | 277 | 235 | 235 | 191 | 195 | 217 | 235 |
| 368 | 1150 | 54 | 181 | 181 | 232 | 232 | 332 | 337 | 189 | 197 | 179 | 181 | 375 | 375 | 175 | 185 | 223 | 223 | 0   | 0   | 0   | 0   | 191 | 191 | 0   | 0   |
| 369 | 1151 | 55 | 181 | 181 | 0   | 0   | 323 | 333 | 198 | 198 | 170 | 181 | 365 | 365 | 179 | 185 | 223 | 223 | 275 | 275 | 235 | 242 | 185 | 191 | 217 | 217 |
| 370 | 1152 | 56 | 0   | 0   | 0   | 0   | 0   | 0   | 0   | 0   | 177 | 177 | 359 | 373 | 179 | 185 | 213 | 213 | 275 | 275 | 235 | 235 | 191 | 195 | 217 | 217 |
| 371 | 1153 | 57 | 176 | 180 | 232 | 232 | 336 | 336 | 0   | 0   | 172 | 172 | 0   | 0   | 175 | 178 | 223 | 223 | 275 | 275 | 235 | 235 | 191 | 195 | 217 | 217 |
| 372 | 1154 | 58 | 181 | 181 | 220 | 220 | 322 | 322 | 0   | 0   | 170 | 179 | 0   | 0   | 175 | 178 | 0   | 0   | 275 | 275 | 235 | 235 | 191 | 195 | 218 | 218 |
| 373 | 1155 | 59 | 177 | 181 | 0   | 0   | 331 | 331 | 189 | 192 | 170 | 181 | 346 | 346 | 0   | 0   | 223 | 223 | 275 | 275 | 235 | 235 | 191 | 195 | 218 | 218 |
| 374 | 1156 | 60 | 176 | 180 | 254 | 254 | 335 | 335 | 188 | 191 | 176 | 176 | 364 | 364 | 179 | 185 | 223 | 223 | 275 | 275 | 235 | 235 | 195 | 199 | 218 | 218 |
| 375 | 1157 | 61 | 182 | 182 | 0   | 0   | 323 | 337 | 189 | 192 | 170 | 170 | 375 | 375 | 179 | 185 | 223 | 223 | 275 | 275 | 235 | 235 | 185 | 195 | 218 | 222 |
| 376 | 1158 | 62 | 179 | 180 | 232 | 254 | 330 | 337 | 192 | 197 | 168 | 180 | 375 | 375 | 179 | 194 | 224 | 224 | 0   | 0   | 235 | 235 | 191 | 191 | 0   | 0   |
| 377 | 1159 | 63 | 181 | 181 | 0   | 0   | 0   | 0   | 192 | 192 | 170 | 176 | 375 | 375 | 176 | 179 | 224 | 224 | 0   | 0   | 0   | 0   | 191 | 195 | 0   | 0   |
| 379 | 1161 | 65 | 180 | 180 | 254 | 254 | 322 | 322 | 191 | 191 | 0   | 0   | 346 | 346 | 179 | 191 | 224 | 224 | 275 | 275 | 235 | 235 | 191 | 195 | 217 | 217 |

|     |      |     |     |     |     |     |     |     |     |     |     |     |     |     |     |     |     |     |     |     |     |     |     |     |     |     |
|-----|------|-----|-----|-----|-----|-----|-----|-----|-----|-----|-----|-----|-----|-----|-----|-----|-----|-----|-----|-----|-----|-----|-----|-----|-----|-----|
| 380 | 1162 | 66  | 0   | 0   | 0   | 0   | 322 | 322 | 191 | 191 | 165 | 179 | 346 | 346 | 178 | 185 | 0   | 0   | 275 | 275 | 235 | 235 | 195 | 195 | 217 | 217 |
| 381 | 1163 | 67  | 176 | 180 | 0   | 0   | 338 | 338 | 192 | 197 | 179 | 181 | 346 | 375 | 178 | 180 | 223 | 223 | 275 | 277 | 235 | 235 | 191 | 195 | 217 | 217 |
| 382 | 1164 | 68  | 176 | 180 | 0   | 0   | 334 | 334 | 188 | 192 | 170 | 177 | 349 | 375 | 179 | 191 | 223 | 223 | 275 | 275 | 235 | 235 | 195 | 195 | 217 | 235 |
| 383 | 1165 | 69  | 0   | 0   | 254 | 254 | 332 | 335 | 192 | 194 | 179 | 179 | 346 | 379 | 179 | 191 | 207 | 207 | 0   | 0   | 0   | 0   | 191 | 191 | 0   | 0   |
| 384 | 1166 | 70  | 180 | 180 | 254 | 254 | 323 | 335 | 0   | 0   | 169 | 169 | 375 | 375 | 179 | 185 | 224 | 224 | 0   | 0   | 0   | 0   | 191 | 195 | 0   | 0   |
| 385 | 1167 | 71  | 181 | 183 | 255 | 255 | 329 | 329 | 192 | 198 | 179 | 179 | 346 | 346 | 179 | 188 | 220 | 223 | 275 | 275 | 235 | 235 | 191 | 191 | 217 | 217 |
| 386 | 1168 | 72  | 178 | 178 | 232 | 232 | 323 | 329 | 198 | 198 | 0   | 0   | 371 | 371 | 179 | 191 | 224 | 224 | 275 | 275 | 235 | 235 | 191 | 195 | 217 | 217 |
| 387 | 1169 | 73  | 176 | 180 | 0   | 0   | 323 | 323 | 0   | 0   | 179 | 179 | 0   | 0   | 179 | 191 | 223 | 223 | 275 | 275 | 235 | 235 | 191 | 195 | 217 | 235 |
| 388 | 1170 | 74  | 0   | 0   | 232 | 254 | 331 | 331 | 192 | 192 | 181 | 181 | 0   | 0   | 175 | 178 | 192 | 192 | 275 | 275 | 235 | 235 | 191 | 191 | 217 | 235 |
| 389 | 1171 | 75  | 178 | 182 | 0   | 0   | 328 | 328 | 188 | 191 | 174 | 176 | 346 | 375 | 179 | 179 | 191 | 223 | 275 | 275 | 235 | 235 | 191 | 195 | 217 | 235 |
| 390 | 1172 | 76  | 0   | 0   | 254 | 254 | 323 | 323 | 189 | 192 | 184 | 176 | 0   | 0   | 186 | 179 | 192 | 223 | 275 | 275 | 235 | 238 | 195 | 195 | 217 | 217 |
| 391 | 1173 | 77  | 0   | 0   | 234 | 252 | 323 | 332 | 189 | 192 | 0   | 0   | 0   | 0   | 0   | 0   | 192 | 192 | 275 | 275 | 235 | 235 | 195 | 195 | 217 | 217 |
| 392 | 1174 | 78  | 181 | 183 | 232 | 255 | 323 | 329 | 189 | 192 | 181 | 185 | 0   | 0   | 189 | 192 | 192 | 192 | 275 | 275 | 235 | 235 | 191 | 195 | 217 | 217 |
| 393 | 1175 | 79  | 181 | 181 | 232 | 255 | 0   | 0   | 0   | 0   | 170 | 170 | 347 | 347 | 180 | 186 | 224 | 224 | 275 | 275 | 235 | 238 | 185 | 191 | 217 | 217 |
| 394 | 1176 | 80  | 176 | 183 | 0   | 0   | 329 | 329 | 189 | 189 | 170 | 176 | 0   | 0   | 179 | 185 | 220 | 220 | 0   | 0   | 0   | 0   | 191 | 191 | 0   | 0   |
| 397 | 1179 | 83  | 180 | 180 | 232 | 232 | 0   | 0   | 189 | 192 | 183 | 183 | 347 | 347 | 178 | 185 | 223 | 223 | 275 | 275 | 235 | 235 | 0   | 0   | 218 | 218 |
| 398 | 1180 | 84  | 181 | 181 | 232 | 232 | 0   | 0   | 192 | 192 | 170 | 176 | 347 | 375 | 178 | 188 | 223 | 223 | 275 | 275 | 235 | 235 | 195 | 195 | 218 | 218 |
| 399 | 1181 | 85  | 181 | 181 | 232 | 232 | 0   | 0   | 189 | 192 | 0   | 0   | 347 | 375 | 178 | 185 | 224 | 224 | 275 | 275 | 235 | 235 | 195 | 195 | 218 | 218 |
| 400 | 1182 | 86  | 181 | 181 | 232 | 232 | 322 | 322 | 189 | 192 | 176 | 176 | 347 | 347 | 176 | 179 | 224 | 224 | 275 | 275 | 235 | 235 | 195 | 195 | 218 | 235 |
| 401 | 1183 | 87  | 181 | 181 | 232 | 232 | 0   | 0   | 189 | 192 | 181 | 181 | 347 | 347 | 179 | 186 | 224 | 224 | 275 | 275 | 235 | 235 | 191 | 195 | 218 | 218 |
| 402 | 1184 | 88  | 181 | 181 | 232 | 232 | 323 | 330 | 192 | 197 | 170 | 179 | 347 | 375 | 178 | 185 | 224 | 224 | 275 | 275 | 235 | 242 | 191 | 195 | 218 | 222 |
| 403 | 1185 | 89  | 180 | 180 | 0   | 0   | 0   | 0   | 186 | 192 | 179 | 179 | 346 | 346 | 178 | 185 | 223 | 223 | 275 | 275 | 235 | 235 | 0   | 0   | 218 | 218 |
| 404 | 1186 | 90  | 180 | 180 | 232 | 232 | 0   | 0   | 188 | 188 | 178 | 178 | 356 | 375 | 178 | 182 | 223 | 223 | 275 | 275 | 235 | 235 | 0   | 0   | 218 | 218 |
| 405 | 1187 | 91  | 176 | 183 | 232 | 232 | 334 | 334 | 192 | 198 | 170 | 176 | 346 | 375 | 178 | 185 | 219 | 219 | 275 | 275 | 235 | 235 | 0   | 0   | 218 | 218 |
| 406 | 1188 | 92  | 181 | 181 | 232 | 232 | 322 | 322 | 192 | 198 | 169 | 177 | 347 | 347 | 178 | 178 | 223 | 223 | 275 | 275 | 235 | 235 | 0   | 0   | 218 | 218 |
| 407 | 1189 | 93  | 181 | 181 | 232 | 254 | 322 | 331 | 192 | 192 | 170 | 177 | 375 | 375 | 178 | 185 | 223 | 223 | 275 | 275 | 235 | 235 | 191 | 191 | 218 | 218 |
| 408 | 1190 | 94  | 181 | 181 | 232 | 254 | 322 | 323 | 192 | 198 | 169 | 169 | 375 | 375 | 176 | 179 | 224 | 224 | 275 | 275 | 235 | 235 | 0   | 0   | 218 | 218 |
| 409 | 1191 | 95  | 181 | 181 | 232 | 254 | 322 | 331 | 189 | 198 | 0   | 0   | 0   | 0   | 0   | 0   | 0   | 0   | 275 | 275 | 235 | 235 | 0   | 0   | 218 | 218 |
| 410 | 1192 | 96  | 183 | 183 | 232 | 232 | 323 | 332 | 192 | 198 | 170 | 170 | 347 | 347 | 178 | 185 | 224 | 224 | 275 | 275 | 235 | 238 | 191 | 193 | 218 | 218 |
| 413 | 1195 | 99  | 180 | 180 | 232 | 254 | 322 | 331 | 192 | 192 | 181 | 181 | 346 | 375 | 185 | 191 | 223 | 223 | 275 | 275 | 235 | 235 | 0   | 0   | 218 | 218 |
| 414 | 1196 | 100 | 181 | 183 | 232 | 256 | 0   | 0   | 189 | 192 | 170 | 176 | 347 | 375 | 178 | 185 | 223 | 223 | 275 | 275 | 235 | 235 | 0   | 0   | 218 | 218 |
| 415 | 1197 | 101 | 181 | 181 | 232 | 232 | 322 | 331 | 186 | 189 | 170 | 181 | 347 | 375 | 178 | 185 | 223 | 223 | 275 | 275 | 235 | 235 | 0   | 0   | 218 | 218 |
| 416 | 1198 | 102 | 181 | 181 | 232 | 232 | 322 | 331 | 189 | 192 | 181 | 181 | 347 | 347 | 178 | 185 | 224 | 224 | 275 | 275 | 235 | 235 | 195 | 195 | 218 | ### |
| 417 | 1199 | 103 | 181 | 181 | 232 | 254 | 322 | 331 | 189 | 192 | 170 | 181 | 347 | 347 | 178 | 194 | 224 | 224 | 275 | 275 | 235 | 235 | 191 | 195 | 218 | 218 |
| 418 | 1200 | 104 | 181 | 181 | 232 | 254 | 323 | 331 | 192 | 192 | 169 | 169 | 347 | 347 | 178 | 185 | 224 | 224 | 0   | 0   | 0   | 0   | 0   | 0   | 0   | 0   |



|     |      |     |     |     |     |     |     |     |     |     |     |     |     |     |     |     |     |     |     |     |     |     |     |     |     |     |
|-----|------|-----|-----|-----|-----|-----|-----|-----|-----|-----|-----|-----|-----|-----|-----|-----|-----|-----|-----|-----|-----|-----|-----|-----|-----|-----|
| 420 | 1202 | 106 | 176 | 180 | 254 | 254 | 0   | 0   | 189 | 192 | 0   | 0   | 347 | 347 | 178 | 178 | 224 | 224 | 275 | 275 | 235 | 235 | 195 | 218 | 218 | 218 |
| 421 | 1203 | 107 | 181 | 181 | 232 | 232 | 0   | 0   | 192 | 192 | 181 | 181 | 346 | 346 | 178 | 185 | 223 | 223 | 275 | 275 | 235 | 235 | 218 | 218 | 218 | 218 |
| 422 | 1204 | 108 | 181 | 181 | 254 | 254 | 0   | 0   | 186 | 186 | 0   | 0   | 347 | 347 | 178 | 178 | 0   | 0   | 275 | 275 | 238 | 238 | 191 | 193 | 218 | 218 |
| 423 | 1205 | 109 | 181 | 181 | 232 | 232 | 0   | 0   | 189 | 192 | 170 | 170 | 347 | 375 | 178 | 185 | 224 | 224 | 275 | 275 | 235 | 235 | 191 | 195 | 218 | 218 |
| 424 | 1206 | 110 | 181 | 183 | 232 | 250 | 330 | 332 | 189 | 192 | 170 | 178 | 375 | 375 | 178 | 185 | 224 | 224 | 0   | 0   | 0   | 0   | 0   | 0   | 0   | 0   |
| 425 | 1207 | 111 | 181 | 181 | 232 | 256 | 322 | 322 | 189 | 198 | 169 | 169 | 347 | 347 | 175 | 178 | 224 | 224 | 275 | 275 | 235 | 235 | 191 | 199 | 218 | 218 |
| 426 | 1208 | 112 | 181 | 181 | 232 | 232 | 323 | 323 | 189 | 192 | 176 | 176 | 347 | 385 | 178 | 178 | 224 | 224 | 275 | 275 | 235 | 235 | 195 | 199 | 218 | 218 |
| 428 | 1210 | 114 | 177 | 181 | 0   | 0   | 331 | 331 | 189 | 192 | 0   | 0   | 346 | 346 | 0   | 0   | 223 | 223 | 275 | 275 | 235 | 235 | 191 | 195 | 218 | 218 |
| 429 | 1211 | 115 | 181 | 181 | 254 | 254 | 0   | 0   | 186 | 186 | 0   | 0   | 347 | 347 | 178 | 178 | 0   | 0   | 275 | 275 | 238 | 238 | 191 | 193 | 218 | 218 |
| 430 | 1212 | 116 | 181 | 181 | 232 | 232 | 331 | 332 | 189 | 198 | 170 | 172 | 347 | 375 | 178 | 188 | 223 | 224 | 275 | 275 | 235 | 235 | 195 | 195 | 220 | 220 |
| 431 | 1213 | 117 | 181 | 181 | 232 | 232 | 335 | 335 | 189 | 195 | 179 | 179 | 347 | 347 | 0   | 0   | 0   | 0   | 275 | 275 | 235 | 235 | 0   | 0   | 218 | 218 |
| 432 | 1214 | 118 | 181 | 183 | 232 | 232 | 322 | 322 | 192 | 192 | 170 | 176 | 347 | 375 | 179 | 185 | 0   | 0   | 275 | 275 | 235 | 235 | 191 | 191 | 218 | 218 |
| 433 | 1215 | 119 | 176 | 183 | 232 | 232 | 334 | 334 | 192 | 198 | 170 | 176 | 346 | 375 | 178 | 185 | 219 | 219 | 275 | 275 | 235 | 235 | 0   | 0   | 218 | 218 |
| 434 | 1216 | 120 | 181 | 183 | 232 | 232 | 323 | 323 | 192 | 198 | 179 | 179 | 347 | 347 | 178 | 178 | 224 | 224 | 275 | 275 | 235 | 235 | 191 | 195 | 218 | 235 |
| 435 | 1217 | 121 | 181 | 181 | 232 | 256 | 322 | 322 | 189 | 198 | 169 | 169 | 347 | 347 | 175 | 178 | 224 | 224 | 275 | 275 | 235 | 235 | 191 | 199 | 218 | 218 |
| 436 | 1218 | 122 | 177 | 181 | 0   | 0   | 0   | 0   | 192 | 198 | 170 | 177 | 347 | 347 | 175 | 178 | 224 | 224 | 275 | 275 | 235 | 235 | 0   | 0   | 218 | 218 |
| 437 | 1219 | 123 | 181 | 181 | 254 | 254 | 322 | 329 | 192 | 198 | 170 | 181 | 346 | 346 | 178 | 178 | 223 | 223 | 275 | 275 | 235 | 235 | 0   | 0   | 218 | 218 |
| 438 | 1220 | 124 | 181 | 183 | 232 | 232 | 323 | 331 | 192 | 192 | 170 | 176 | 347 | 375 | 178 | 185 | 211 | 223 | 275 | 275 | 235 | 235 | 0   | 0   | 218 | 218 |
| 439 | 1221 | 125 | 181 | 181 | 232 | 232 | 332 | 337 | 189 | 192 | 181 | 181 | 347 | 375 | 178 | 185 | 223 | 223 | 275 | 275 | 235 | 235 | 0   | 0   | 218 | 218 |
| 440 | 1222 | 126 | 181 | 181 | 232 | 232 | 323 | 330 | 192 | 198 | 179 | 181 | 347 | 375 | 178 | 185 | 224 | 224 | 275 | 275 | 235 | 235 | 191 | 195 | 218 | 218 |
| 441 | 1223 | 127 | 181 | 181 | 244 | 254 | 322 | 329 | 189 | 189 | 0   | 0   | 0   | 0   | 0   | 0   | 0   | 0   | 275 | 275 | 235 | 235 | 195 | 195 | 218 | 218 |
| 442 | 1224 | 128 | 181 | 181 | 232 | 232 | 323 | 332 | 189 | 192 | 170 | 170 | 347 | 375 | 178 | 185 | 224 | 224 | 275 | 275 | 235 | 235 | 195 | 195 | 218 | 218 |
| 443 | 1225 | 129 | 180 | 180 | 0   | 0   | 0   | 0   | 192 | 192 | 179 | 179 | 346 | 375 | 178 | 185 | 223 | 223 | 275 | 275 | 235 | 235 | 0   | 0   | 218 | 218 |
| 444 | 1226 | 130 | 177 | 181 | 0   | 0   | 0   | 0   | 189 | 192 | 0   | 0   | 346 | 346 | 0   | 0   | 0   | 0   | 275 | 275 | 235 | 235 | 0   | 0   | 218 | 218 |
| 445 | 1227 | 131 | 181 | 181 | 232 | 232 | 0   | 0   | 192 | 192 | 170 | 176 | 346 | 375 | 185 | 188 | 224 | 224 | 275 | 275 | 235 | 238 | 0   | 0   | 218 | 218 |
| 446 | 1228 | 132 | 181 | 181 | 232 | 254 | 335 | 335 | 189 | 192 | 170 | 177 | 347 | 347 | 178 | 178 | 223 | 223 | 275 | 275 | 235 | 235 | 0   | 0   | 218 | 218 |
| 447 | 1229 | 133 | 181 | 181 | 232 | 275 | 323 | 332 | 189 | 192 | 176 | 176 | 347 | 375 | 178 | 194 | 224 | 224 | 275 | 275 | 235 | 235 | 0   | 0   | 218 | 218 |
| 448 | 1230 | 134 | 181 | 181 | 232 | 232 | 332 | 332 | 192 | 198 | 170 | 174 | 347 | 375 | 178 | 188 | 224 | 224 | 275 | 275 | 235 | 235 | 0   | 0   | 218 | 218 |
| 449 | 1231 | 135 | 181 | 181 | 232 | 254 | 323 | 332 | 192 | 201 | 170 | 177 | 347 | 365 | 178 | 191 | 224 | 227 | 275 | 275 | 235 | 235 | 185 | 185 | 218 | 218 |
| 450 | 1232 | 136 | 181 | 181 | 232 | 232 | 323 | 323 | 192 | 201 | 170 | 170 | 347 | 375 | 178 | 185 | 224 | 224 | 275 | 275 | 235 | 235 | 191 | 195 | 218 | 220 |
| 451 | 1233 | 137 | 0   | 0   | 233 | 255 | 323 | 329 | 191 | 198 | 179 | 179 | 375 | 375 | 179 | 179 | 224 | 224 | 275 | 275 | 235 | 235 | 190 | 194 | 235 | 235 |
| 452 | 1234 | 138 | 177 | 182 | 233 | 255 | 331 | 331 | 191 | 201 | 172 | 172 | 347 | 347 | 179 | 185 | 0   | 0   | 275 | 275 | 235 | 235 | 190 | 194 | 217 | 217 |
| 453 | 1235 | 139 | 0   | 0   | 231 | 255 | 329 | 329 | 191 | 198 | 0   | 0   | 375 | 375 | 179 | 185 | 0   | 0   | 275 | 275 | 235 | 235 | 185 | 191 | 207 | 303 |
| 454 | 1236 | 140 | 182 | 182 | 233 | 233 | 322 | 331 | 191 | 198 | 179 | 179 | 364 | 374 | 179 | 185 | 223 | 223 | 275 | 275 | 235 | 235 | 190 | 196 | 202 | 217 |
| 455 | 1237 | 141 | 0   | 0   | 0   | 0   | 0   | 0   | 186 | 191 | 176 | 176 | 346 | 346 | 179 | 188 | 0   | 0   | 275 | 275 | 235 | 235 | 194 | 235 | 218 | 220 |

|     |      |     |     |     |     |     |     |     |     |     |     |     |     |     |     |     |     |     |     |     |     |     |     |     |     |     |
|-----|------|-----|-----|-----|-----|-----|-----|-----|-----|-----|-----|-----|-----|-----|-----|-----|-----|-----|-----|-----|-----|-----|-----|-----|-----|-----|
| 456 | 1238 | 142 | 182 | 182 | 0   | 0   | 322 | 322 | 191 | 191 | 179 | 179 | 346 | 346 | 180 | 180 | 0   | 0   | 275 | 275 | 235 | 235 | 191 | 235 | 217 | 217 |
| 457 | 1239 | 143 | 182 | 182 | 0   | 0   | 329 | 329 | 186 | 191 | 177 | 179 | 345 | 345 | 180 | 180 | 223 | 223 | 275 | 275 | 235 | 235 | 195 | 195 | 218 | 218 |
| 459 | 1244 | 145 | 182 | 184 | 233 | 255 | 322 | 322 | 191 | 191 | 0   | 0   | 346 | 346 | 175 | 179 | 0   | 0   | 275 | 275 | 235 | 235 | 191 | 195 | 217 | 217 |
| 460 | 1245 | 146 | 176 | 182 | 0   | 0   | 328 | 328 | 189 | 189 | 170 | 170 | 0   | 0   | 179 | 191 | 0   | 0   | 275 | 275 | 219 | 235 | 195 | 236 | 218 | 235 |
| 461 | 1246 | 147 | 182 | 182 | 0   | 0   | 331 | 338 | 189 | 197 | 0   | 0   | 0   | 0   | 179 | 185 | 0   | 0   | 275 | 275 | 235 | 275 | 195 | 235 | 217 | 221 |
| 463 | 1248 | 149 | 176 | 180 | 232 | 232 | 329 | 329 | 189 | 191 | 170 | 172 | 346 | 374 | 179 | 185 | 0   | 0   | 275 | 275 | 235 | 275 | 236 | 275 | 218 | 235 |
| 464 | 1249 | 150 | 181 | 181 | 0   | 0   | 322 | 322 | 189 | 197 | 0   | 0   | 0   | 0   | 0   | 0   | 223 | 223 | 275 | 275 | 235 | 235 | 195 | 195 | 217 | 235 |
| 466 | 1251 | 152 | 0   | 0   | 0   | 0   | 322 | 322 | 191 | 197 | 0   | 0   | 0   | 0   | 179 | 191 | 0   | 0   | 275 | 275 | 235 | 235 | 191 | 195 | 217 | 217 |
| 467 | 1252 | 153 | 176 | 176 | 0   | 0   | 334 | 334 | 191 | 198 | 0   | 0   | 346 | 346 | 179 | 179 | 0   | 0   | 275 | 275 | 235 | 238 | 191 | 195 | 217 | 217 |
| 468 | 1253 | 154 | 182 | 182 | 233 | 233 | 322 | 334 | 191 | 198 | 0   | 0   | 346 | 346 | 0   | 0   | 0   | 0   | 275 | 275 | 235 | 235 | 195 | 235 | 217 | 217 |
| 469 | 1254 | 155 | 182 | 182 | 232 | 232 | 322 | 332 | 191 | 198 | 0   | 0   | 0   | 0   | 180 | 180 | 0   | 0   | 275 | 275 | 235 | 242 | 195 | 195 | 217 | 218 |
| 471 | 1256 | 157 | 0   | 0   | 0   | 0   | 323 | 329 | 191 | 198 | 0   | 0   | 0   | 0   | 179 | 185 | 0   | 0   | 275 | 275 | 235 | 238 | 191 | 195 | 218 | 218 |
| 472 | 1257 | 158 | 184 | 184 | 232 | 232 | 331 | 332 | 191 | 191 | 0   | 0   | 347 | 371 | 179 | 191 | 0   | 0   | 275 | 275 | 234 | 234 | 191 | 191 | 0   | 0   |
| 474 | 1259 | 160 | 177 | 182 | 233 | 233 | 322 | 336 | 191 | 198 | 0   | 0   | 374 | 375 | 179 | 194 | 0   | 0   | 270 | 275 | 235 | 235 | 195 | 195 | 217 | 217 |
| 475 | 1260 | 161 | 181 | 181 | 233 | 233 | 331 | 331 | 191 | 198 | 179 | 179 | 346 | 375 | 179 | 185 | 223 | 223 | 275 | 275 | 235 | 235 | 191 | 195 | 217 | 217 |
| 476 | 1261 | 162 | 182 | 184 | 233 | 255 | 322 | 328 | 189 | 191 | 176 | 176 | 375 | 375 | 179 | 185 | 223 | 223 | 275 | 275 | 235 | 235 | 195 | 195 | 217 | 217 |
| 477 | 1262 | 163 | 182 | 184 | 0   | 0   | 322 | 323 | 189 | 191 | 0   | 0   | 353 | 353 | 179 | 185 | 0   | 0   | 275 | 275 | 233 | 235 | 191 | 195 | 217 | 217 |
| 478 | 1263 | 164 | 182 | 184 | 0   | 0   | 323 | 323 | 189 | 191 | 0   | 0   | 346 | 346 | 179 | 185 | 0   | 0   | 275 | 275 | 235 | 235 | 195 | 195 | 217 | 218 |
| 479 | 1264 | 165 | 176 | 181 | 0   | 0   | 323 | 330 | 191 | 198 | 0   | 0   | 346 | 346 | 179 | 185 | 0   | 0   | 275 | 275 | 235 | 235 | 191 | 195 | 218 | 218 |
| 480 | 1265 | 166 | 182 | 182 | 0   | 0   | 322 | 331 | 191 | 191 | 170 | 170 | 375 | 382 | 179 | 185 | 223 | 223 | 275 | 275 | 235 | 235 | 191 | 191 | 215 | 217 |
| 481 | 1277 | 1   | 182 | 184 | 0   | 0   | 322 | 334 | 191 | 194 | 177 | 177 | 347 | 347 | 179 | 191 | 223 | 223 | 275 | 275 | 235 | 235 | 191 | 191 | 217 | 217 |
| 482 | 1278 | 2   | 182 | 182 | 233 | 255 | 322 | 334 | 191 | 194 | 0   | 0   | 0   | 0   | 179 | 188 | 0   | 0   | 275 | 275 | 235 | 235 | 191 | 191 | 217 | 217 |
| 483 | 1279 | 3   | 184 | 184 | 233 | 233 | 334 | 335 | 191 | 198 | 169 | 179 | 0   | 0   | 175 | 179 | 223 | 223 | 0   | 0   | 0   | 0   | 0   | 0   | 0   | 0   |
| 484 | 1280 | 4   | 0   | 0   | 0   | 0   | 326 | 326 | 0   | 0   | 179 | 179 | 346 | 375 | 179 | 194 | 223 | 223 | 0   | 0   | 235 | 242 | 185 | 191 | 235 | 277 |
| 485 | 1281 | 5   | 179 | 184 | 232 | 232 | 335 | 337 | 198 | 198 | 0   | 0   | 364 | 367 | 180 | 186 | 0   | 0   | 275 | 275 | 235 | 235 | 191 | 195 | 218 | 218 |
| 487 | 1283 | 7   | 0   | 0   | 0   | 0   | 323 | 337 | 191 | 191 | 173 | 173 | 346 | 367 | 178 | 178 | 0   | 0   | 275 | 275 | 235 | 238 | 191 | 195 | 220 | 220 |
| 488 | 1284 | 8   | 184 | 184 | 232 | 255 | 334 | 336 | 191 | 191 | 0   | 0   | 347 | 365 | 179 | 185 | 0   | 0   | 275 | 275 | 235 | 235 | 193 | 195 | 217 | 235 |
| 489 | 1285 | 9   | 182 | 182 | 0   | 0   | 331 | 337 | 191 | 194 | 173 | 179 | 0   | 0   | 0   | 0   | 223 | 223 | 275 | 275 | 238 | 238 | 185 | 195 | 206 | 217 |
| 490 | 1286 | 10  | 182 | 182 | 233 | 233 | 334 | 336 | 191 | 191 | 173 | 173 | 347 | 347 | 185 | 191 | 223 | 223 | 275 | 275 | 235 | 235 | 191 | 195 | 217 | 235 |
| 491 | 1287 | 11  | 184 | 184 | 232 | 232 | 334 | 334 | 191 | 201 | 0   | 0   | 343 | 346 | 185 | 191 | 0   | 0   | 275 | 275 | 235 | 238 | 193 | 193 | 217 | 217 |
| 492 | 1288 | 12  | 176 | 184 | 232 | 232 | 334 | 334 | 185 | 191 | 0   | 0   | 346 | 346 | 179 | 185 | 0   | 0   | 270 | 270 | 235 | 238 | 193 | 195 | 217 | 217 |
| 493 | 1289 | 13  | 182 | 182 | 232 | 232 | 334 | 334 | 191 | 194 | 0   | 0   | 346 | 346 | 179 | 185 | 0   | 0   | 275 | 275 | 235 | 238 | 193 | 195 | 235 | 235 |
| 497 | 1293 | 17  | 182 | 184 | 233 | 233 | 336 | 336 | 191 | 191 | 177 | 177 | 346 | 346 | 179 | 185 | 223 | 223 | 270 | 275 | 235 | 238 | 189 | 195 | 202 | 217 |
| 498 | 1294 | 18  | 0   | 0   | 233 | 233 | 322 | 336 | 191 | 201 | 0   | 0   | 367 | 367 | 172 | 175 | 0   | 0   | 275 | 275 | 235 | 238 | 191 | 197 | 217 | 221 |
| 499 | 1295 | 19  | 0   | 0   | 232 | 232 | 336 | 336 | 186 | 195 | 175 | 175 | 346 | 346 | 179 | 191 | 223 | 223 | 275 | 275 | 235 | 238 | 193 | 193 | 192 | 198 |

|     |       |    |     |     |     |     |     |     |     |     |     |     |     |     |     |     |     |     |     |     |     |     |     |     |     |     |
|-----|-------|----|-----|-----|-----|-----|-----|-----|-----|-----|-----|-----|-----|-----|-----|-----|-----|-----|-----|-----|-----|-----|-----|-----|-----|-----|
| 500 | 1296  | 20 | 179 | 184 | 232 | 232 | 323 | 335 | 191 | 201 | 0   | 0   | 346 | 366 | 180 | 180 | 0   | 0   | 275 | 275 | 238 | 238 | 191 | 197 | 218 | 218 |
| 503 | 1299  | 23 | 0   | 0   | 0   | 0   | 337 | 337 | 191 | 191 | 179 | 179 | 346 | 346 | 175 | 179 | 223 | 223 | 275 | 275 | 235 | 238 | 191 | 195 | 220 | 220 |
| 504 | 1300  | 24 | 182 | 184 | 233 | 233 | 336 | 337 | 191 | 191 | 173 | 173 | 347 | 367 | 179 | 185 | 223 | 223 | 275 | 275 | 235 | 235 | 191 | 195 | 235 | 235 |
| 505 | 1301  | 25 | 184 | 184 | 0   | 0   | 322 | 322 | 191 | 191 | 0   | 0   | 0   | 0   | 0   | 0   | 223 | 223 | 275 | 275 | 235 | 238 | 191 | 197 | 217 | 217 |
| 506 | 1302  | 26 | 184 | 184 | 0   | 0   | 322 | 322 | 191 | 191 | 179 | 179 | 367 | 367 | 179 | 191 | 223 | 223 | 275 | 275 | 238 | 238 | 193 | 195 | 217 | 217 |
| 507 | 1303  | 27 | 184 | 184 | 255 | 255 | 338 | 338 | 191 | 195 | 176 | 176 | 346 | 369 | 179 | 191 | 223 | 223 | 275 | 275 | 235 | 235 | 191 | 193 | 217 | 217 |
| 511 | 1307  | 31 | 182 | 182 | 0   | 0   | 329 | 331 | 189 | 191 | 175 | 175 | 0   | 0   | 0   | 0   | 223 | 223 | 0   | 0   | 0   | 0   | 0   | 0   | 0   | 0   |
| 520 | 1357  | 40 | 182 | 182 | 232 | 232 | 329 | 338 | 191 | 191 | 173 | 179 | 356 | 356 | 179 | 185 | 223 | 223 | 275 | 277 | 235 | 235 | 195 | 195 | 217 | 235 |
| 521 | 1358  | 41 | 184 | 184 | 233 | 255 | 334 | 334 | 191 | 198 | 177 | 177 | 347 | 347 | 179 | 182 | 223 | 223 | 275 | 275 | 235 | 244 | 185 | 195 | 217 | 217 |
| 522 | 1359  | 42 | 184 | 184 | 0   | 0   | 332 | 334 | 191 | 195 | 0   | 0   | 347 | 384 | 179 | 185 | 223 | 223 | 0   | 0   | 0   | 0   | 0   | 0   | 0   | 0   |
| 523 | 1360  | 43 | 179 | 184 | 0   | 0   | 322 | 329 | 191 | 198 | 175 | 175 | 348 | 355 | 175 | 179 | 223 | 223 | 275 | 275 | 235 | 238 | 195 | 197 | 217 | 217 |
| 524 | 1361  | 44 | 184 | 184 | 232 | 254 | 331 | 334 | 191 | 191 | 0   | 0   | 375 | 375 | 175 | 185 | 223 | 223 | 0   | 0   | 0   | 0   | 0   | 0   | 0   | 0   |
| 525 | 1362  | 45 | 184 | 184 | 0   | 0   | 338 | 338 | 186 | 189 | 179 | 179 | 0   | 0   | 0   | 0   | 0   | 0   | 275 | 275 | 235 | 235 | 191 | 195 | 215 | 217 |
| 526 | 1363  | 46 | 177 | 182 | 232 | 232 | 334 | 334 | 191 | 191 | 173 | 173 | 347 | 375 | 179 | 185 | 223 | 223 | 275 | 275 | 235 | 235 | 195 | 197 | 217 | 242 |
| 527 | 1364  | 47 | 179 | 184 | 254 | 254 | 322 | 331 | 191 | 191 | 0   | 0   | 347 | 365 | 179 | 179 | 223 | 223 | 0   | 0   | 0   | 0   | 0   | 0   | 0   | 0   |
| 528 | 1365  | 48 | 184 | 184 | 0   | 0   | 336 | 336 | 0   | 0   | 179 | 179 | 347 | 375 | 179 | 175 | 223 | 223 | 277 | 275 | 235 | 235 | 195 | 197 | 217 | 217 |
| 529 | 1366  | 49 | 0   | 0   | 0   | 0   | 329 | 329 | 194 | 194 | 176 | 176 | 347 | 374 | 179 | 191 | 223 | 223 | 275 | 275 | 235 | 238 | 195 | 195 | 206 | 217 |
| 530 | 1367  | 50 | 182 | 184 | 233 | 233 | 329 | 331 | 189 | 191 | 0   | 0   | 364 | 364 | 179 | 185 | 223 | 223 | 0   | 0   | 0   | 0   | 0   | 0   | 0   | 0   |
| 531 | 1368  | 51 | 184 | 184 | 233 | 255 | 329 | 336 | 191 | 194 | 0   | 0   | 0   | 0   | 0   | 0   | 0   | 0   | 275 | 275 | 235 | 235 | 195 | 195 | 217 | 217 |
| 532 | 1369  | 52 | 177 | 182 | 255 | 255 | 330 | 330 | 191 | 191 | 0   | 0   | 346 | 355 | 185 | 179 | 0   | 0   | 275 | 275 | 235 | 235 | 195 | 235 | 217 | 217 |
| 533 | 1370  | 53 | 182 | 182 | 0   | 0   | 329 | 336 | 191 | 203 | 0   | 0   | 0   | 0   | 0   | 0   | 0   | 0   | 275 | 275 | 235 | 235 | 195 | 195 | 217 | 217 |
| 535 | 1372  | 55 | 177 | 182 | 0   | 0   | 331 | 331 | 191 | 201 | 177 | 177 | 346 | 346 | 173 | 189 | 223 | 223 | 275 | 275 | 235 | 235 | 185 | 195 | 217 | 217 |
| 536 | 1373  | 56 | 184 | 184 | 232 | 232 | 330 | 331 | 191 | 201 | 179 | 179 | 347 | 347 | 185 | 188 | 223 | 223 | 275 | 275 | 235 | 235 | 195 | 195 | 217 | 217 |
| 537 | 1374  | 57 | 182 | 184 | 232 | 232 | 331 | 333 | 191 | 201 | 173 | 173 | 347 | 363 | 179 | 188 | 223 | 223 | 275 | 275 | 235 | 235 | 191 | 195 | 217 | 217 |
| 538 | 1375  | 58 | 177 | 184 | 232 | 232 | 333 | 333 | 191 | 194 | 0   | 0   | 347 | 347 | 179 | 185 | 223 | 223 | 275 | 275 | 235 | 235 | 191 | 195 | 217 | 235 |
| 539 | 1376  | 59 | 182 | 184 | 232 | 256 | 327 | 327 | 191 | 201 | 179 | 179 | 347 | 347 | 179 | 191 | 223 | 223 | 0   | 0   | 235 | 238 | 191 | 191 | 217 | 217 |
| 540 | 1377  | 60 | 179 | 184 | 232 | 232 | 332 | 337 | 191 | 198 | 176 | 176 | 375 | 375 | 175 | 185 | 223 | 223 | 275 | 275 | 235 | 238 | 185 | 191 | 217 | 217 |
| 541 | 1378  | 61 | 184 | 184 | 232 | 232 | 334 | 337 | 191 | 198 | 0   | 0   | 0   | 0   | 0   | 0   | 0   | 0   | 275 | 275 | 235 | 235 | 185 | 191 | 217 | 217 |
| 542 | 1379  | 62 | 176 | 182 | 0   | 0   | 338 | 338 | 186 | 191 | 179 | 179 | 356 | 356 | 182 | 185 | 0   | 0   | 275 | 289 | 235 | 235 | 185 | 197 | 217 | 217 |
| 543 | 1380  | 63 | 178 | 178 | 0   | 0   | 330 | 337 | 191 | 194 | 177 | 177 | 365 | 365 | 179 | 185 | 0   | 0   | 275 | 275 | 235 | 235 | 191 | 191 | 217 | 217 |
| 545 | 759-2 |    | 181 | 181 | 232 | 252 | 329 | 329 | 0   | 0   | 177 | 178 | 343 | 368 | 180 | 191 | 0   | 0   | 275 | 275 | 234 | 234 | 190 | 196 | 217 | 217 |
| 546 | 759-3 |    | 181 | 181 | 232 | 232 | 0   | 0   | 186 | 192 | 174 | 177 | 346 | 368 | 182 | 191 | 219 | 219 | 275 | 275 | 0   | 0   | 0   | 0   | 218 | 218 |
| 547 | 759-4 |    | 0   | 0   | 0   | 0   | 323 | 333 | 0   | 0   | 177 | 179 | 343 | 346 | 178 | 192 | 223 | 223 | 275 | 275 | 234 | 234 | 192 | 194 | 0   | 0   |
| 548 | 759-5 |    | 179 | 179 | 232 | 254 | 323 | 329 | 186 | 192 | 177 | 178 | 346 | 368 | 177 | 178 | 223 | 223 | 275 | 275 | 234 | 234 | 192 | 194 | 218 | 218 |
| 549 | 759-6 |    | 181 | 181 | 0   | 0   | 323 | 323 | 184 | 192 | 178 | 178 | 343 | 343 | 179 | 191 | 223 | 223 | 275 | 275 | 234 | 234 | 192 | 192 | 218 | 218 |

|     |        |     |     |     |     |     |     |     |     |     |     |     |     |     |     |     |     |     |     |     |     |     |     |     |     |
|-----|--------|-----|-----|-----|-----|-----|-----|-----|-----|-----|-----|-----|-----|-----|-----|-----|-----|-----|-----|-----|-----|-----|-----|-----|-----|
| 550 | 759-7  | 179 | 179 | 232 | 254 | 329 | 337 | 192 | 192 | 0   | 0   | 347 | 368 | 183 | 191 | 219 | 223 | 0   | 0   | 234 | 234 | 0   | 0   | 217 | 217 |
| 551 | 759-8  | 179 | 179 | 232 | 232 | 329 | 329 | 0   | 0   | 177 | 177 | 343 | 347 | 182 | 191 | 223 | 223 | 275 | 275 | 234 | 234 | 0   | 0   | 217 | 235 |
| 552 | 759-9  | 0   | 0   | 232 | 253 | 0   | 0   | 192 | 192 | 177 | 178 | 0   | 0   | 176 | 191 | 0   | 0   | 270 | 275 | 0   | 0   | 0   | 0   | 217 | 217 |
| 553 | 759-10 | 181 | 181 | 232 | 253 | 0   | 0   | 186 | 192 | 177 | 177 | 366 | 368 | 179 | 191 | 0   | 0   | 255 | 275 | 234 | 275 | 190 | 196 | 217 | 275 |
| 554 | 759-11 | 181 | 181 | 232 | 254 | 329 | 331 | 192 | 198 | 178 | 178 | 343 | 368 | 180 | 191 | 219 | 223 | 275 | 275 | 234 | 234 | 190 | 190 | 217 | 217 |
| 555 | 759-12 | 0   | 0   | 0   | 0   | 323 | 323 | 192 | 198 | 178 | 178 | 343 | 343 | 180 | 191 | 219 | 223 | 275 | 275 | 234 | 234 | 192 | 194 | 217 | 217 |
| 556 | 759-13 | 179 | 181 | 0   | 0   | 323 | 329 | 192 | 192 | 177 | 177 | 343 | 391 | 178 | 178 | 223 | 223 | 275 | 277 | 234 | 234 | 192 | 194 | 218 | 218 |
| 557 | 759-14 | 179 | 179 | 232 | 254 | 323 | 331 | 192 | 192 | 177 | 177 | 347 | 368 | 178 | 178 | 223 | 223 | 275 | 275 | 234 | 234 | 192 | 194 | 218 | 218 |
| 558 | 759-15 | 179 | 179 | 232 | 254 | 329 | 337 | 192 | 192 | 170 | 177 | 347 | 368 | 191 | 191 | 223 | 223 | 275 | 275 | 234 | 234 | 192 | 192 | 217 | 217 |
| 559 | 759-16 | 179 | 179 | 232 | 254 | 323 | 323 | 192 | 198 | 0   | 0   | 0   | 0   | 180 | 191 | 0   | 0   | 275 | 277 | 234 | 238 | 192 | 194 | 217 | 235 |
| 560 | 759-17 | 0   | 0   | 232 | 232 | 323 | 323 | 192 | 198 | 177 | 178 | 0   | 0   | 177 | 191 | 0   | 0   | 275 | 275 | 0   | 0   | 0   | 0   | 217 | 219 |
| 561 | 759-18 | 0   | 0   | 232 | 254 | 323 | 329 | 192 | 198 | 178 | 178 | 343 | 346 | 178 | 191 | 0   | 0   | 275 | 277 | 0   | 0   | 0   | 0   | 217 | 217 |
| 562 | 759-19 | 179 | 179 | 232 | 232 | 323 | 327 | 192 | 198 | 177 | 179 | 368 | 368 | 182 | 191 | 223 | 223 | 275 | 275 | 234 | 234 | 190 | 194 | 217 | 217 |
| 563 | 759-20 | 179 | 179 | 232 | 254 | 0   | 0   | 192 | 198 | 173 | 177 | 343 | 346 | 183 | 191 | 219 | 223 | 275 | 275 | 234 | 235 | 190 | 196 | 218 | 218 |
| 564 | 759-21 | 179 | 179 | 232 | 254 | 323 | 323 | 192 | 198 | 178 | 178 | 368 | 368 | 178 | 178 | 219 | 223 | 275 | 275 | 234 | 275 | 192 | 196 | 218 | 218 |
| 565 | 759-22 | 179 | 179 | 232 | 232 | 329 | 329 | 192 | 198 | 178 | 178 | 343 | 390 | 178 | 192 | 219 | 223 | 275 | 275 | 234 | 234 | 192 | 192 | 218 | 218 |
| 566 | 759-23 | 0   | 0   | 232 | 254 | 323 | 329 | 192 | 198 | 177 | 178 | 343 | 369 | 0   | 0   | 223 | 223 | 270 | 275 | 234 | 234 | 192 | 192 | 218 | 218 |
| 567 | 759-24 | 179 | 179 | 232 | 232 | 323 | 329 | 192 | 198 | 178 | 178 | 343 | 347 | 179 | 191 | 223 | 223 | 275 | 275 | 234 | 234 | 192 | 194 | 217 | 217 |
| 568 | 759-25 | 179 | 179 | 232 | 253 | 323 | 327 | 186 | 192 | 178 | 178 | 343 | 368 | 181 | 191 | 219 | 219 | 275 | 275 | 234 | 234 | 0   | 0   | 217 | 217 |
| 569 | 759-26 | 179 | 179 | 232 | 232 | 329 | 329 | 192 | 198 | 178 | 178 | 366 | 368 | 178 | 191 | 219 | 219 | 275 | 275 | 234 | 234 | 0   | 0   | 218 | 218 |
| 570 | 759-27 | 179 | 179 | 0   | 0   | 323 | 331 | 192 | 192 | 174 | 177 | 368 | 368 | 183 | 191 | 219 | 219 | 275 | 275 | 234 | 275 | 190 | 196 | 217 | 217 |
| 571 | 759-28 | 179 | 179 | 0   | 0   | 323 | 327 | 192 | 192 | 0   | 0   | 346 | 368 | 179 | 191 | 219 | 223 | 275 | 275 | 234 | 275 | 190 | 192 | 217 | 217 |
| 572 | 759-29 | 179 | 179 | 232 | 232 | 323 | 329 | 192 | 198 | 178 | 178 | 366 | 368 | 178 | 178 | 219 | 223 | 275 | 275 | 234 | 234 | 190 | 192 | 217 | 217 |
| 573 | 759-30 | 179 | 179 | 232 | 254 | 0   | 0   | 192 | 192 | 177 | 180 | 368 | 368 | 177 | 191 | 223 | 223 | 275 | 288 | 234 | 275 | 192 | 192 | 218 | 218 |
| 574 | 759-31 | 179 | 179 | 0   | 0   | 0   | 0   | 192 | 192 | 178 | 178 | 343 | 390 | 183 | 191 | 223 | 223 | 275 | 275 | 234 | 234 | 192 | 194 | 218 | 218 |
| 575 | 759-32 | 179 | 179 | 0   | 0   | 323 | 323 | 192 | 192 | 177 | 177 | 343 | 346 | 182 | 191 | 219 | 223 | 0   | 0   | 234 | 234 | 192 | 194 | 217 | 217 |
| 576 | 759-33 | 0   | 0   | 232 | 232 | 323 | 323 | 192 | 192 | 177 | 177 | 343 | 343 | 182 | 191 | 219 | 219 | 275 | 275 | 234 | 234 | 0   | 0   | 217 | 217 |
| 577 | 759-34 | 0   | 0   | 232 | 232 | 0   | 0   | 0   | 0   | 177 | 178 | 368 | 368 | 177 | 191 | 223 | 223 | 275 | 275 | 234 | 234 | 192 | 196 | 217 | 217 |
| 578 | 759-35 | 0   | 0   | 232 | 254 | 323 | 323 | 192 | 192 | 177 | 177 | 343 | 391 | 178 | 192 | 219 | 219 | 275 | 275 | 234 | 234 | 192 | 196 | 217 | 217 |
| 579 | 759-36 | 179 | 179 | 232 | 254 | 323 | 323 | 192 | 192 | 178 | 178 | 343 | 343 | 178 | 192 | 223 | 223 | 275 | 275 | 234 | 234 | 192 | 192 | 217 | 217 |
| 580 | 759-37 | 179 | 179 | 232 | 254 | 0   | 0   | 192 | 192 | 177 | 180 | 368 | 368 | 178 | 180 | 219 | 223 | 275 | 275 | 234 | 275 | 192 | 192 | 217 | 218 |
| 581 | 759-38 | 179 | 179 | 232 | 232 | 323 | 326 | 192 | 192 | 177 | 177 | 343 | 366 | 177 | 178 | 223 | 219 | 270 | 275 | 234 | 234 | 192 | 192 | 218 | 218 |
| 582 | 759-39 | 179 | 179 | 232 | 232 | 0   | 0   | 192 | 192 | 177 | 177 | 366 | 368 | 183 | 191 | 223 | 223 | 275 | 235 | 234 | 234 | 192 | 194 | 218 | 235 |
| 583 | 759-40 | 179 | 179 | 232 | 232 | 329 | 329 | 192 | 192 | 178 | 178 | 343 | 355 | 178 | 191 | 223 | 223 | 275 | 275 | 234 | 275 | 192 | 194 | 217 | 235 |
| 584 | 759-41 | 179 | 179 | 232 | 232 | 323 | 323 | 192 | 192 | 177 | 177 | 0   | 0   | 177 | 191 | 0   | 0   | 273 | 275 | 0   | 0   | 0   | 0   | 217 | 217 |

|     |        |     |     |     |     |     |     |     |     |     |     |     |     |     |     |     |     |     |     |     |     |     |     |     |     |
|-----|--------|-----|-----|-----|-----|-----|-----|-----|-----|-----|-----|-----|-----|-----|-----|-----|-----|-----|-----|-----|-----|-----|-----|-----|-----|
| 586 | 759-43 | 0   | 0   | 232 | 232 | 323 | 323 | 192 | 192 | 178 | 178 | 0   | 0   | 191 | 191 | 223 | 223 | 275 | 275 | 234 | 234 | 192 | 196 | 217 | 217 |
| 587 | 759-44 | 179 | 179 | 232 | 254 | 323 | 326 | 192 | 192 | 177 | 178 | 0   | 0   | 180 | 191 | 223 | 223 | 275 | 275 | 234 | 234 | 192 | 196 | 217 | 217 |
| 588 | 759-45 | 179 | 179 | 233 | 254 | 323 | 323 | 192 | 192 | 178 | 178 | 0   | 0   | 180 | 191 | 219 | 223 | 275 | 288 | 234 | 234 | 190 | 196 | 218 | 218 |
| 589 | 759-46 | 179 | 179 | 232 | 254 | 326 | 329 | 192 | 192 | 177 | 177 | 347 | 368 | 186 | 191 | 223 | 223 | 275 | 275 | 234 | 275 | 192 | 196 | 218 | 218 |
| 590 | 759-47 | 179 | 179 | 0   | 0   | 323 | 323 | 192 | 192 | 177 | 177 | 0   | 0   | 178 | 183 | 219 | 219 | 275 | 275 | 234 | 275 | 192 | 194 | 218 | 218 |
| 591 | 759-48 | 179 | 179 | 0   | 0   | 323 | 323 | 192 | 192 | 178 | 178 | 0   | 0   | 182 | 191 | 219 | 219 | 275 | 275 | 234 | 234 | 192 | 194 | 217 | 217 |
| 592 | 906-1  | 179 | 179 | 232 | 232 | 336 | 336 | 189 | 192 | 177 | 177 | 355 | 355 | 178 | 182 | 223 | 223 | 275 | 275 | 234 | 234 |     | 0   | 217 | 217 |
| 594 | 906-3  | 177 | 181 | 232 | 253 | 336 | 336 | 192 | 192 | 177 | 177 | 346 | 346 | 178 | 178 | 223 | 223 | 270 | 275 | 234 | 275 | 194 | 194 | 217 | 217 |
| 595 | 906-4  | 0   | 0   | 232 | 232 | 319 | 326 | 192 | 192 | 177 | 177 | 355 | 364 | 180 | 180 | 223 | 223 | 204 | 275 | 234 | 275 | 194 | 194 | 217 | 217 |
| 596 | 906-5  | 181 | 181 | 232 | 232 | 0   | 0   | 192 | 192 | 171 | 171 | 346 | 375 | 180 | 192 | 223 | 223 | 0   | 0   | 234 | 234 | 194 | 194 | 217 | 217 |
| 597 | 906-6  | 179 | 179 | 232 | 232 | 336 | 336 | 0   | 0   | 177 | 177 | 0   | 0   | 180 | 186 | 0   | 0   | 256 | 275 | 234 | 275 | 194 | 194 | 203 | 217 |
| 598 | 906-7  | 179 | 179 | 232 | 233 | 0   | 0   | 189 | 192 | 177 | 177 | 355 | 355 | 180 | 189 | 223 | 223 | 275 | 277 | 234 | 275 | 185 | 194 | 217 | 217 |
| 601 | 906-10 | 181 | 181 | 232 | 255 | 336 | 336 | 192 | 192 | 171 | 173 | 346 | 374 | 177 | 180 | 223 | 223 | 270 | 275 | 234 | 234 | 194 | 194 | 217 | 217 |
| 602 | 906-11 | 179 | 179 | 0   | 0   | 336 | 336 | 192 | 192 | 173 | 177 | 346 | 346 | 180 | 180 | 223 | 223 | 275 | 275 | 234 | 234 | 194 | 194 | 217 | 217 |
| 603 | 906-12 | 179 | 179 | 232 | 232 | 336 | 338 | 192 | 192 | 169 | 177 | 346 | 346 | 177 | 180 | 223 | 223 | 275 | 277 | 234 | 234 | 194 | 194 | 203 | 217 |
| 604 | 906-13 | 181 | 181 | 232 | 232 | 336 | 338 | 192 | 192 | 171 | 171 | 346 | 346 | 177 | 180 | 223 | 223 | 256 | 275 | 234 | 275 | 194 | 194 | 203 | 217 |
| 605 | 906-14 | 179 | 181 | 232 | 232 | 329 | 336 | 189 | 192 | 177 | 177 | 346 | 346 | 180 | 192 | 223 | 223 | 275 | 277 | 234 | 275 | 185 | 194 | 217 | 217 |
| 606 | 906-15 | 179 | 179 | 232 | 232 | 326 | 336 | 192 | 192 | 173 | 177 | 346 | 346 | 180 | 186 | 223 | 223 | 264 | 275 | 234 | 275 | 192 | 194 | 217 | 217 |
| 607 | 906-16 | 179 | 179 | 232 | 232 | 319 | 329 | 189 | 192 | 177 | 180 | 346 | 346 | 180 | 181 | 223 | 223 | 0   | 0   | 0   | 0   | 0   | 0   | 0   | 0   |
| 608 | 906-17 | 181 | 181 | 232 | 232 | 336 | 338 | 189 | 192 | 177 | 177 | 355 | 355 | 180 | 185 | 223 | 223 | 235 | 275 | 218 | 234 | 0   | 0   | 217 | 235 |
| 609 | 906-18 | 179 | 179 | 232 | 232 | 336 | 336 | 192 | 192 | 177 | 177 | 346 | 346 | 180 | 185 | 223 | 223 | 256 | 275 | 234 | 275 | 194 | 194 | 217 | 217 |
| 610 | 906-19 | 0   | 0   | 232 | 232 | 0   | 0   | 192 | 192 | 174 | 177 | 346 | 346 | 176 | 180 | 223 | 223 | 275 | 275 | 234 | 275 | 194 | 194 | 217 | 217 |
| 611 | 906-20 | 179 | 179 | 0   | 0   | 336 | 338 | 189 | 192 | 177 | 177 | 346 | 355 | 177 | 180 | 223 | 223 | 0   | 0   | 234 | 241 | 194 | 194 | 217 | 217 |
| 612 | 906-21 | 179 | 181 | 0   | 0   | 329 | 336 | 192 | 192 | 177 | 177 | 355 | 355 | 180 | 186 | 223 | 223 | 256 | 275 | 234 | 275 | 194 | 194 | 217 | 275 |
| 613 | 906-22 | 179 | 179 | 232 | 232 | 334 | 336 | 189 | 192 | 0   | 0   | 346 | 346 | 180 | 189 | 223 | 223 | 235 | 275 | 219 | 234 | 192 | 194 | 217 | 235 |
| 614 | 906-23 | 181 | 181 | 232 | 232 | 319 | 334 | 189 | 192 | 0   | 0   | 355 | 355 | 180 | 189 | 223 | 223 | 275 | 275 | 234 | 238 | 192 | 194 | 217 | 217 |
| 616 | 906-25 | 179 | 179 | 232 | 232 | 319 | 326 | 192 | 192 | 177 | 177 | 346 | 346 | 180 | 181 | 223 | 223 | 275 | 275 | 0   | 0   | 0   | 0   | 217 | 217 |
| 617 | 906-26 | 181 | 181 | 232 | 232 | 0   | 0   | 192 | 192 | 171 | 173 | 346 | 346 | 176 | 180 | 223 | 223 | 275 | 275 | 234 | 241 | 194 | 194 | 217 | 221 |
| 618 | 906-27 | 179 | 181 | 232 | 232 | 322 | 336 | 192 | 192 | 171 | 177 | 346 | 346 | 178 | 191 | 223 | 223 | 275 | 277 | 234 | 275 | 194 | 194 | 217 | 217 |
| 619 | 906-28 | 0   | 0   | 232 | 232 | 319 | 326 | 192 | 192 | 175 | 177 | 346 | 346 | 180 | 189 | 223 | 223 | 270 | 275 | 234 | 234 | 194 | 194 | 217 | 217 |
| 620 | 906-29 | 0   | 0   | 232 | 232 | 322 | 336 | 189 | 192 | 177 | 177 | 346 | 356 | 177 | 180 | 223 | 223 | 275 | 275 | 234 | 234 | 194 | 194 | 217 | 217 |
| 621 | 906-30 | 179 | 181 | 232 | 232 | 336 | 336 | 192 | 200 | 171 | 171 | 346 | 346 | 174 | 180 | 223 | 223 | 275 | 277 | 234 | 234 | 194 | 194 | 203 | 217 |
| 622 | 906-31 | 179 | 179 | 232 | 232 | 336 | 336 | 192 | 192 | 171 | 179 | 0   | 0   | 177 | 180 | 223 | 223 | 256 | 275 | 234 | 275 | 194 | 194 | 203 | 217 |
| 623 | 906-32 | 179 | 181 | 0   | 0   | 0   | 0   | 192 | 192 | 177 | 177 | 355 | 365 | 180 | 186 | 223 | 223 | 275 | 277 | 234 | 275 | 185 | 194 | 217 | 217 |
| 625 | 906-34 | 0   | 0   | 232 | 232 | 336 | 338 | 192 | 200 | 177 | 179 | 0   | 0   | 176 | 180 | 223 | 223 | 270 | 275 | 234 | 234 | 0   | 0   | 217 | 221 |

|     |        |     |     |     |     |     |     |     |     |     |     |     |     |     |     |     |     |     |     |     |     |     |     |     |     |
|-----|--------|-----|-----|-----|-----|-----|-----|-----|-----|-----|-----|-----|-----|-----|-----|-----|-----|-----|-----|-----|-----|-----|-----|-----|-----|
| 626 | 906-35 | 179 | 179 | 232 | 232 | 331 | 336 | 192 | 192 | 171 | 171 | 346 | 346 | 180 | 180 | 223 | 223 | 275 | 275 | 234 | 275 | 194 | 194 | 217 | 217 |
| 627 | 906-36 | 179 | 179 | 0   | 0   | 322 | 336 | 192 | 200 | 171 | 179 | 346 | 346 | 180 | 192 | 223 | 223 | 275 | 275 | 234 | 275 | 194 | 194 | 203 | 217 |
| 628 | 906-37 | 179 | 181 | 232 | 232 | 319 | 336 | 189 | 192 | 172 | 177 | 346 | 355 | 180 | 189 | 223 | 223 | 275 | 275 | 234 | 275 | 194 | 194 | 203 | 217 |
| 629 | 906-38 | 179 | 179 | 232 | 255 | 319 | 329 | 189 | 192 | 177 | 177 | 346 | 346 | 177 | 180 | 223 | 223 | 275 | 275 | 234 | 275 | 185 | 194 | 217 | 217 |
| 630 | 906-39 | 179 | 181 | 232 | 232 | 336 | 336 | 192 | 192 | 171 | 173 | 0   | 0   | 173 | 180 | 223 | 223 | 0   | 0   | 0   | 0   | 0   | 0   | 0   | 0   |
| 631 | 906-40 | 179 | 179 | 232 | 232 | 336 | 336 | 189 | 192 | 171 | 179 | 355 | 365 | 180 | 190 | 223 | 223 | 256 | 275 | 234 | 241 | 192 | 194 | 217 | 235 |



—
